# Supplementary material for: Synthesis of new acyclic chelators H4aPyta and H6aPyha and their complexes with Cu2+, Ga3+, Y3+, and Bi3+
Source: Royal Society of Chemistry journal article supplement (doi:10.1039/d3dt03451h), 2023-12-11
Supplement: d3dt03451h1.pdf [file d3dt03451h1.pdf]

## Electronic Supplementary Information

### Synthesis of New Acyclic Chelators H<sub>4</sub>aPyta and H<sub>6</sub>aPyha and their Complexes with Cu<sup>2+</sup>, Ga<sup>3+</sup>, Y<sup>3+</sup>, and Bi<sup>3+</sup>

Anastasia D. Zubenko, Anna A. Shchukina, Ekaterina Y. Chernikova, Bayirta V. Egorova, Irina S. Ikonnikova, Anna B. Priselkova, Anton A. Larenkov, Viktor B. Bubenshchikov, Artem A. Mitrofanov, Yury V. Fedorov, Olga A. Fedorova

#### Content

|                                                               |    |
|---------------------------------------------------------------|----|
| 1. NMR and mass spectra of compounds.....                     | 2  |
| 2. Mass spectra of complexes .....                            | 12 |
| 3. NMR study of ligand protonation and complex formation..... | 16 |
| 4. HPLC of complexes .....                                    | 18 |
| 5. DFT calculations .....                                     | 22 |
| 6. Radiolabeling.....                                         | 25 |
| 7. <i>In vitro</i> stability.....                             | 27 |
| 8. Potentiometry .....                                        | 28 |

## 1. NMR and mass spectra of compounds

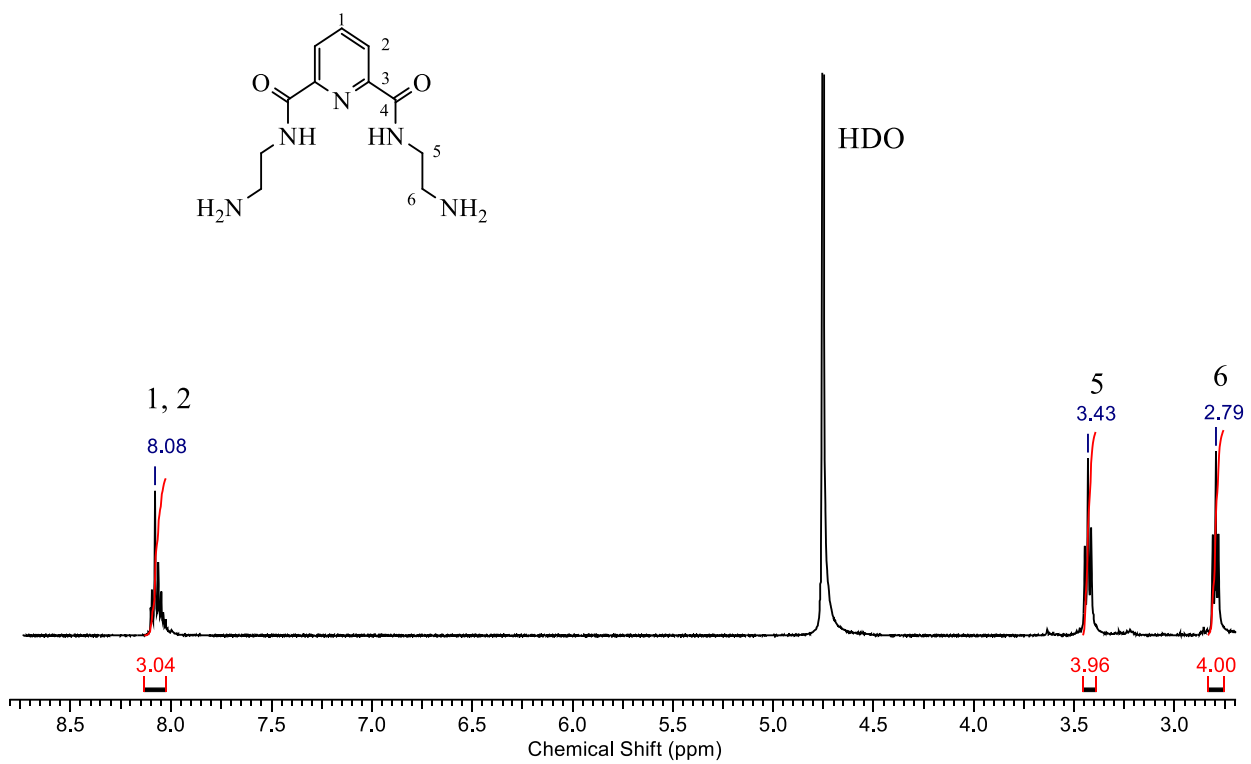

Figure S1.  $^1\text{H}$  NMR spectrum of **2** in  $\text{D}_2\text{O}$ .

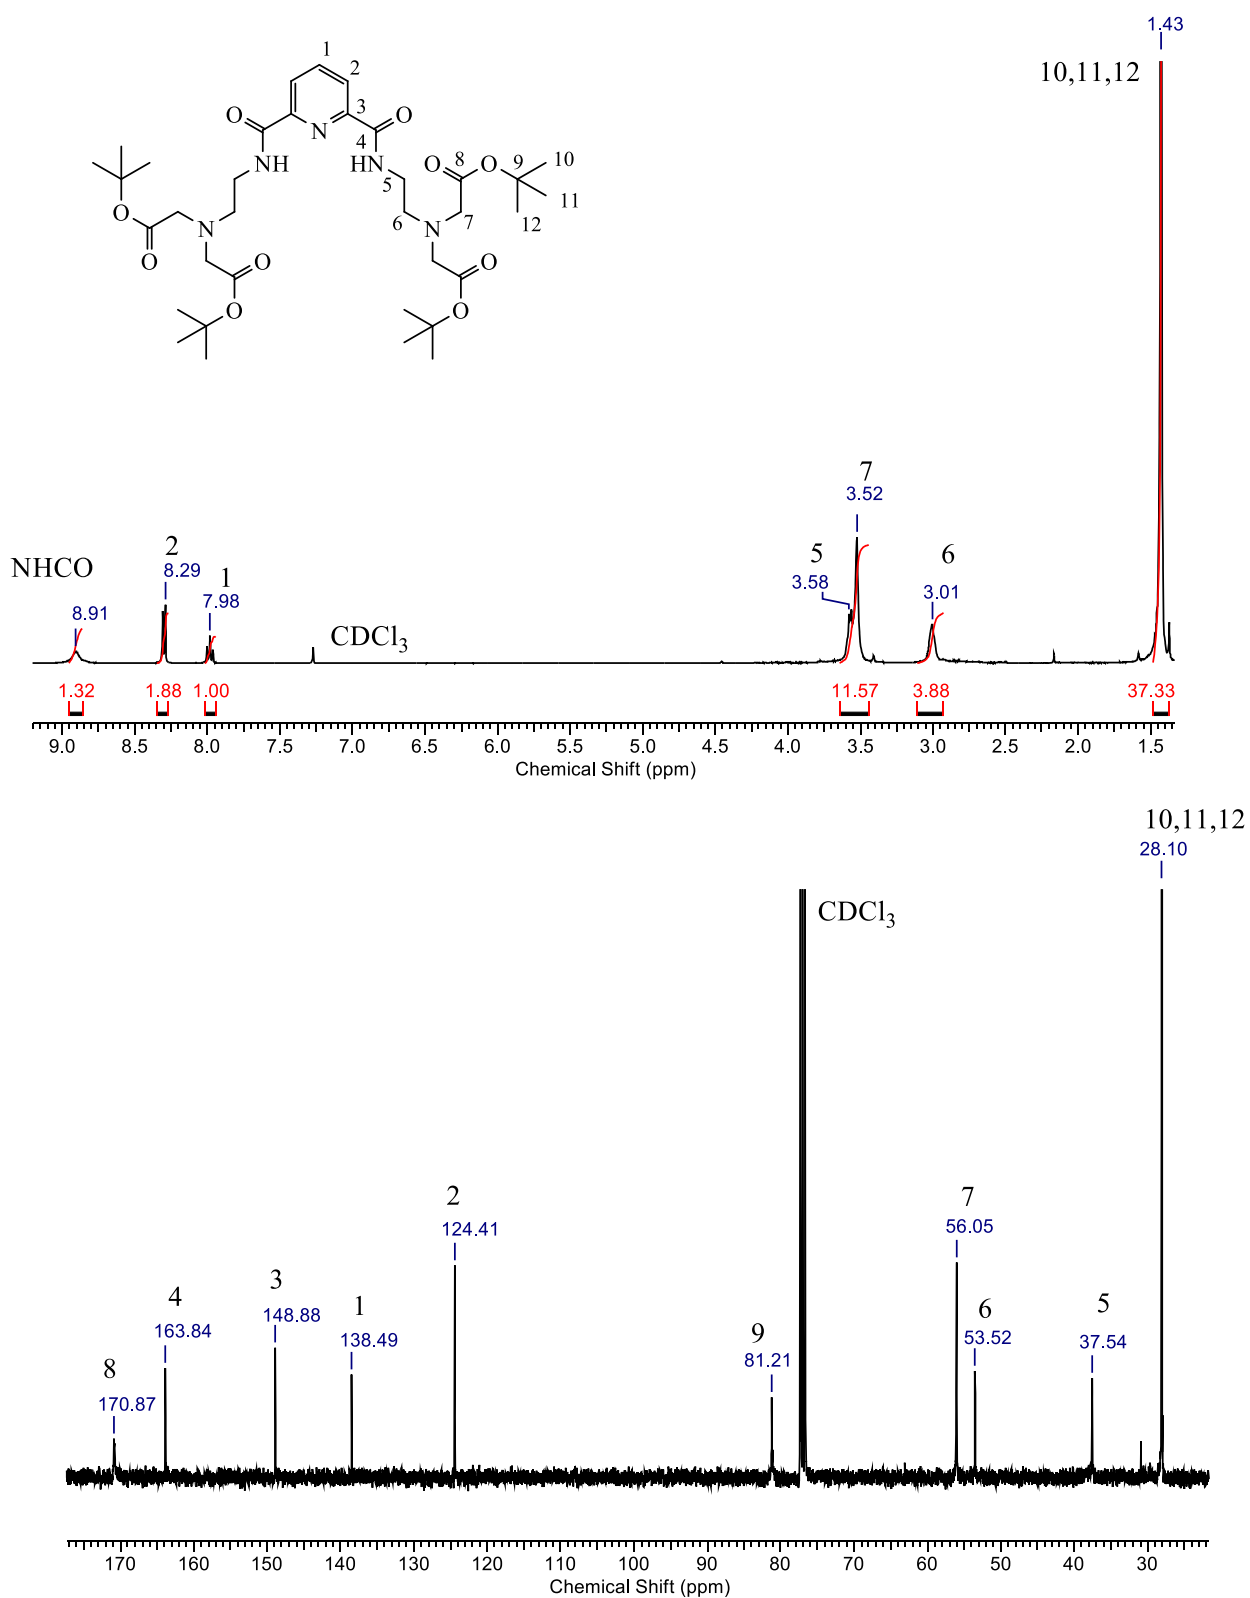

Figure S2. <sup>1</sup>H and <sup>13</sup>C NMR spectra of **3** in CDCl<sub>3</sub>.

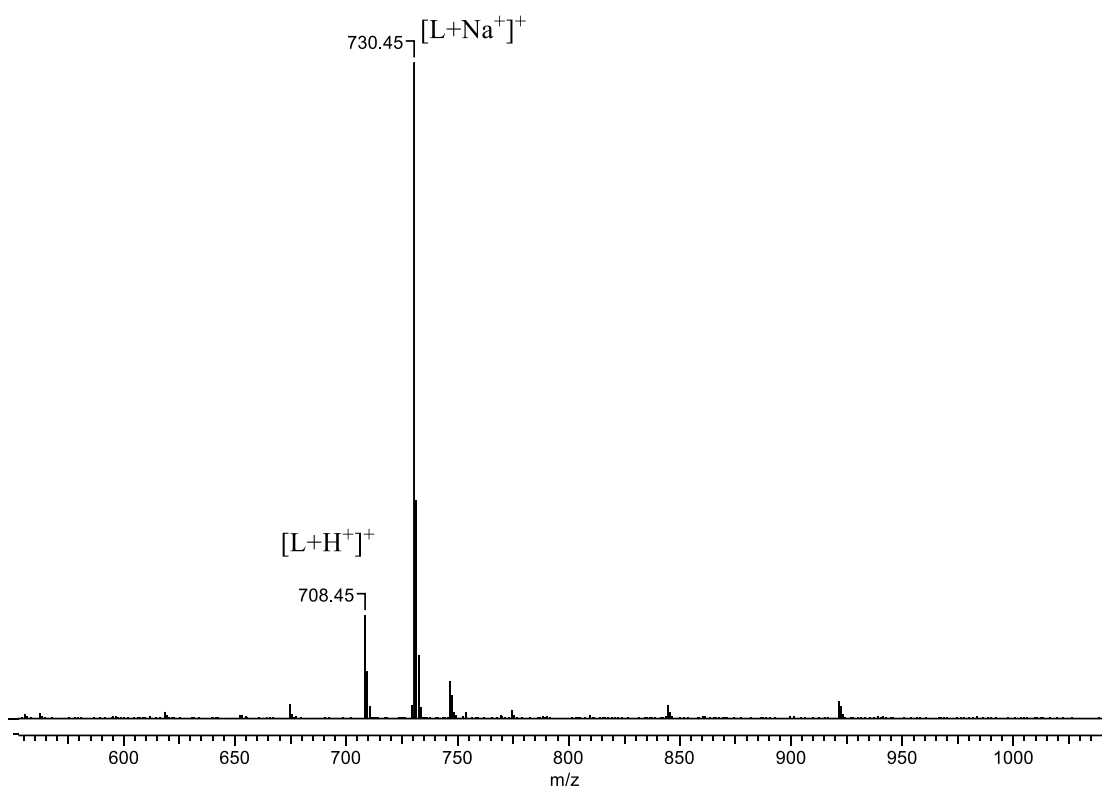

**Figure S3.** MS (ESI) spectrum of **3**.

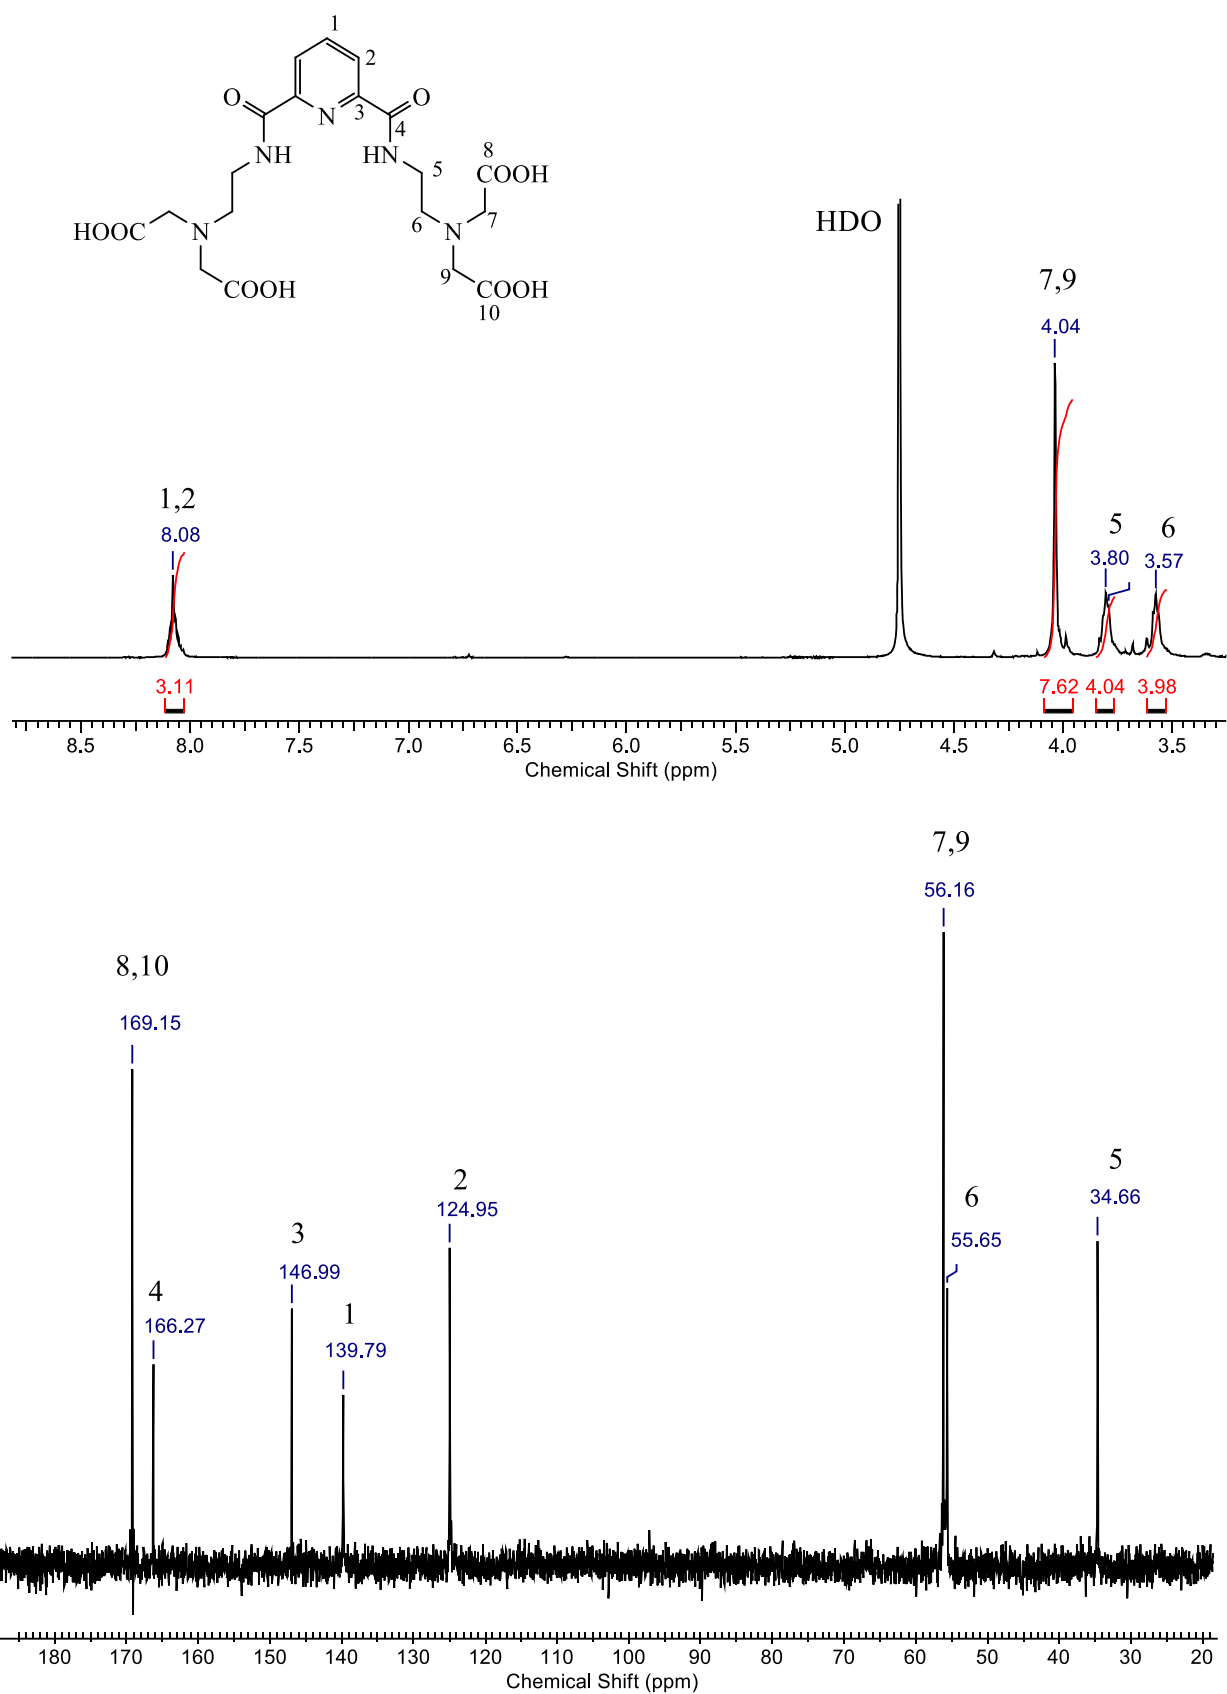

Figure S4. <sup>1</sup>H and <sup>13</sup>C NMR spectra of H<sub>4</sub>aPyta in D<sub>2</sub>O.

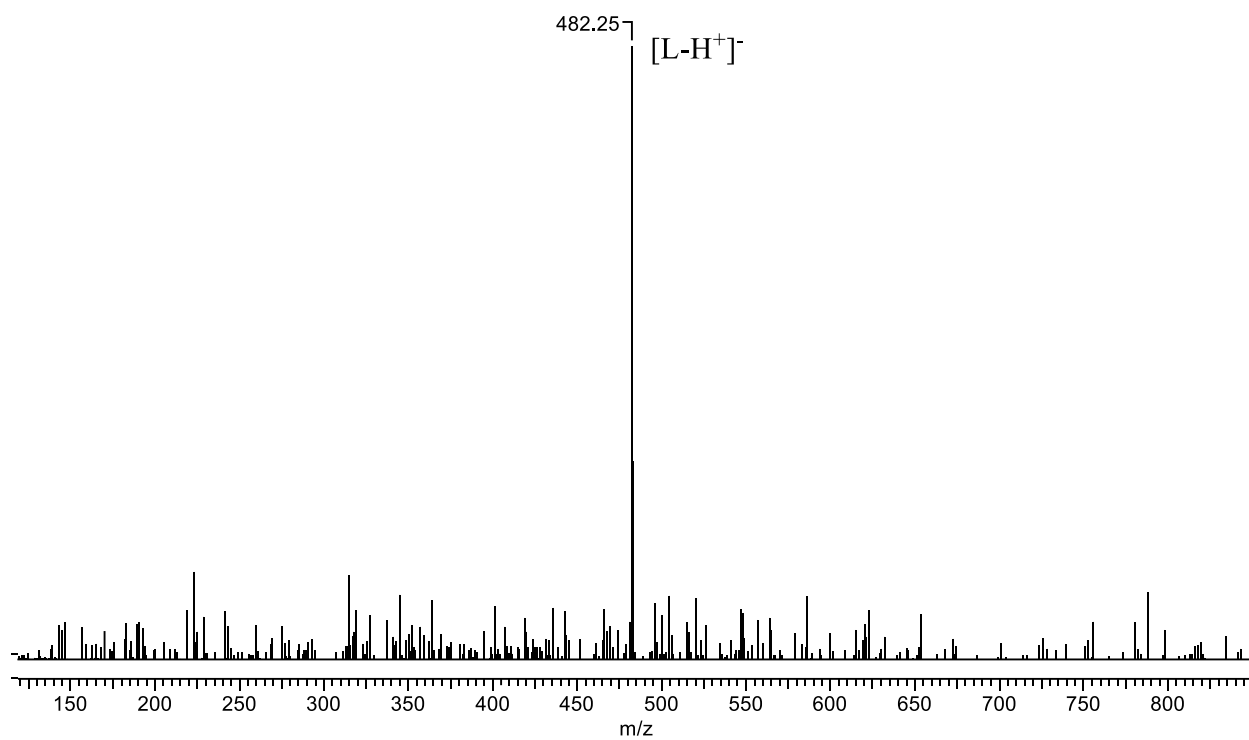

**Figure S5.** MS (ESI) spectrum of H<sub>4</sub>aPyta.

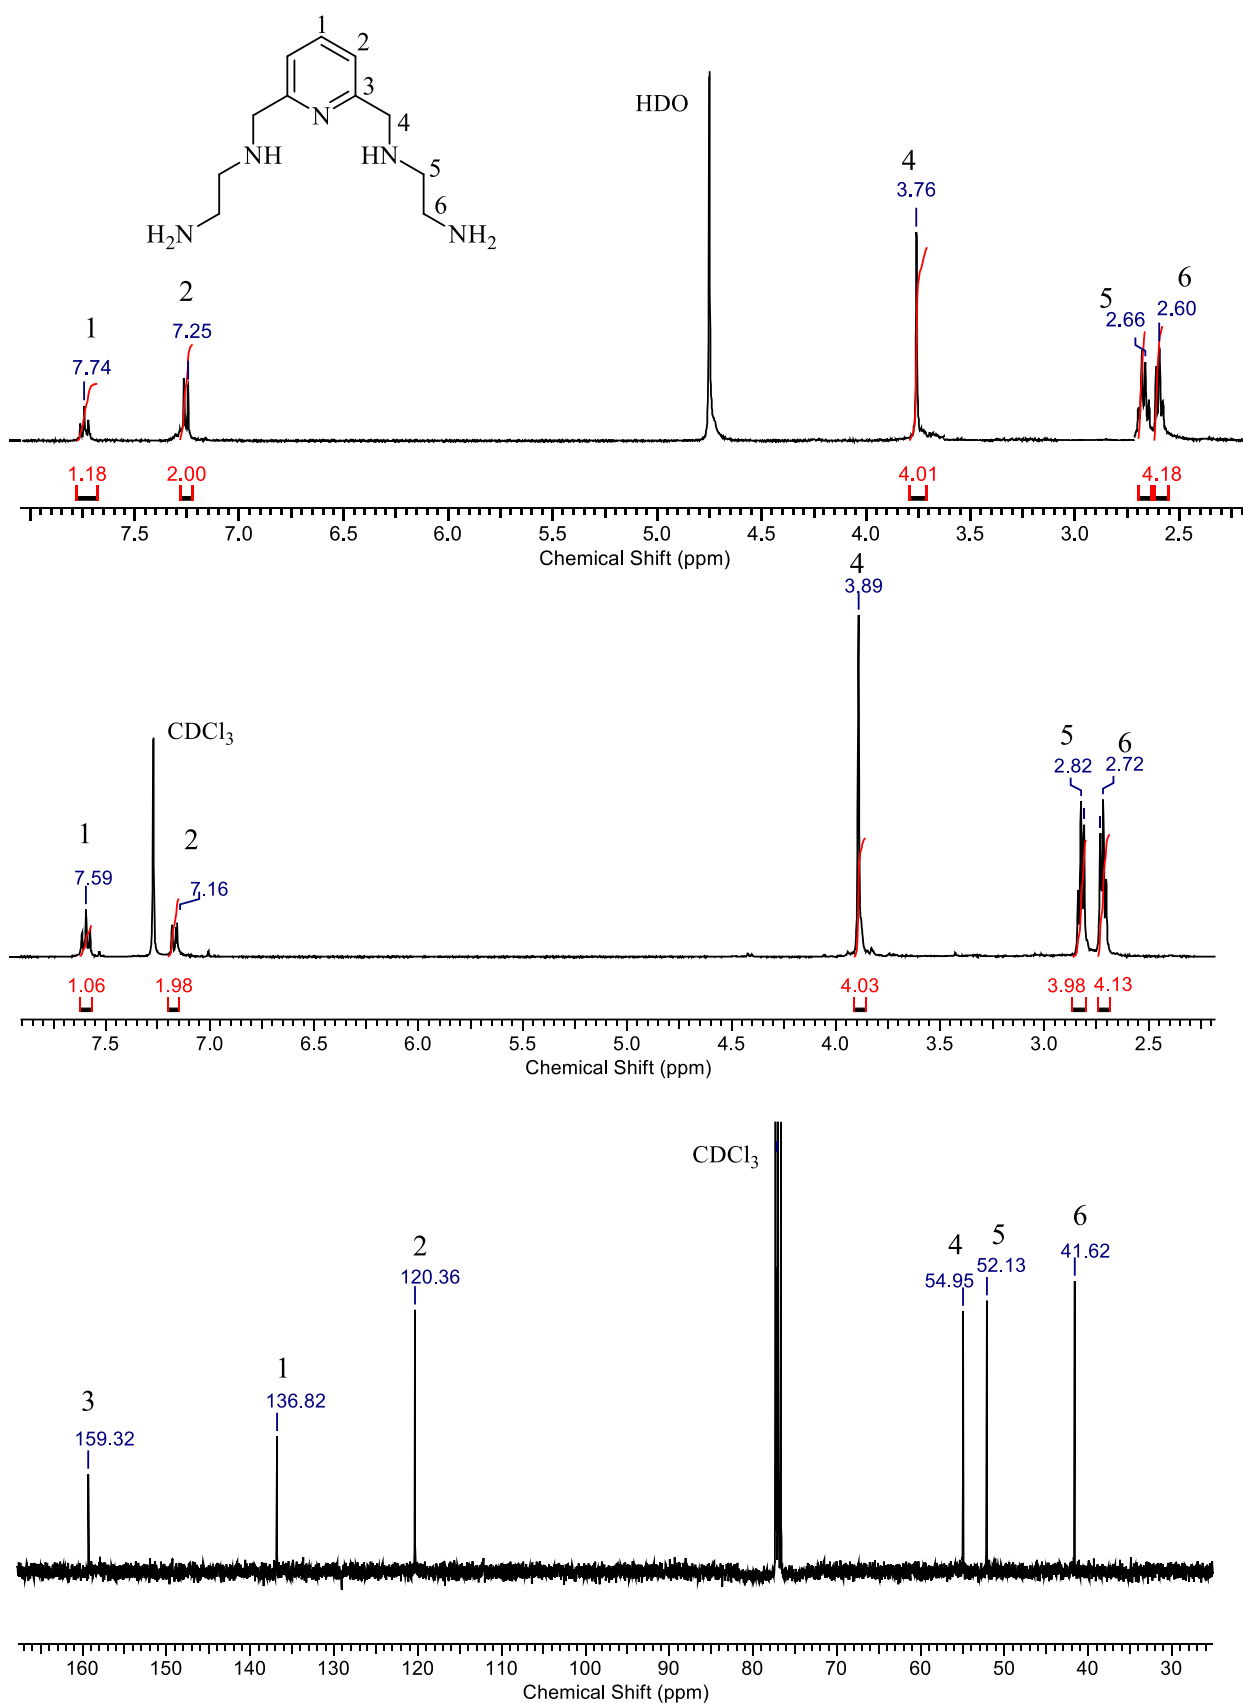

**Figure S6.**  $^1\text{H}$  and  $^{13}\text{C}$  NMR spectra of **5** in  $\text{D}_2\text{O}$  and  $\text{CDCl}_3$ .

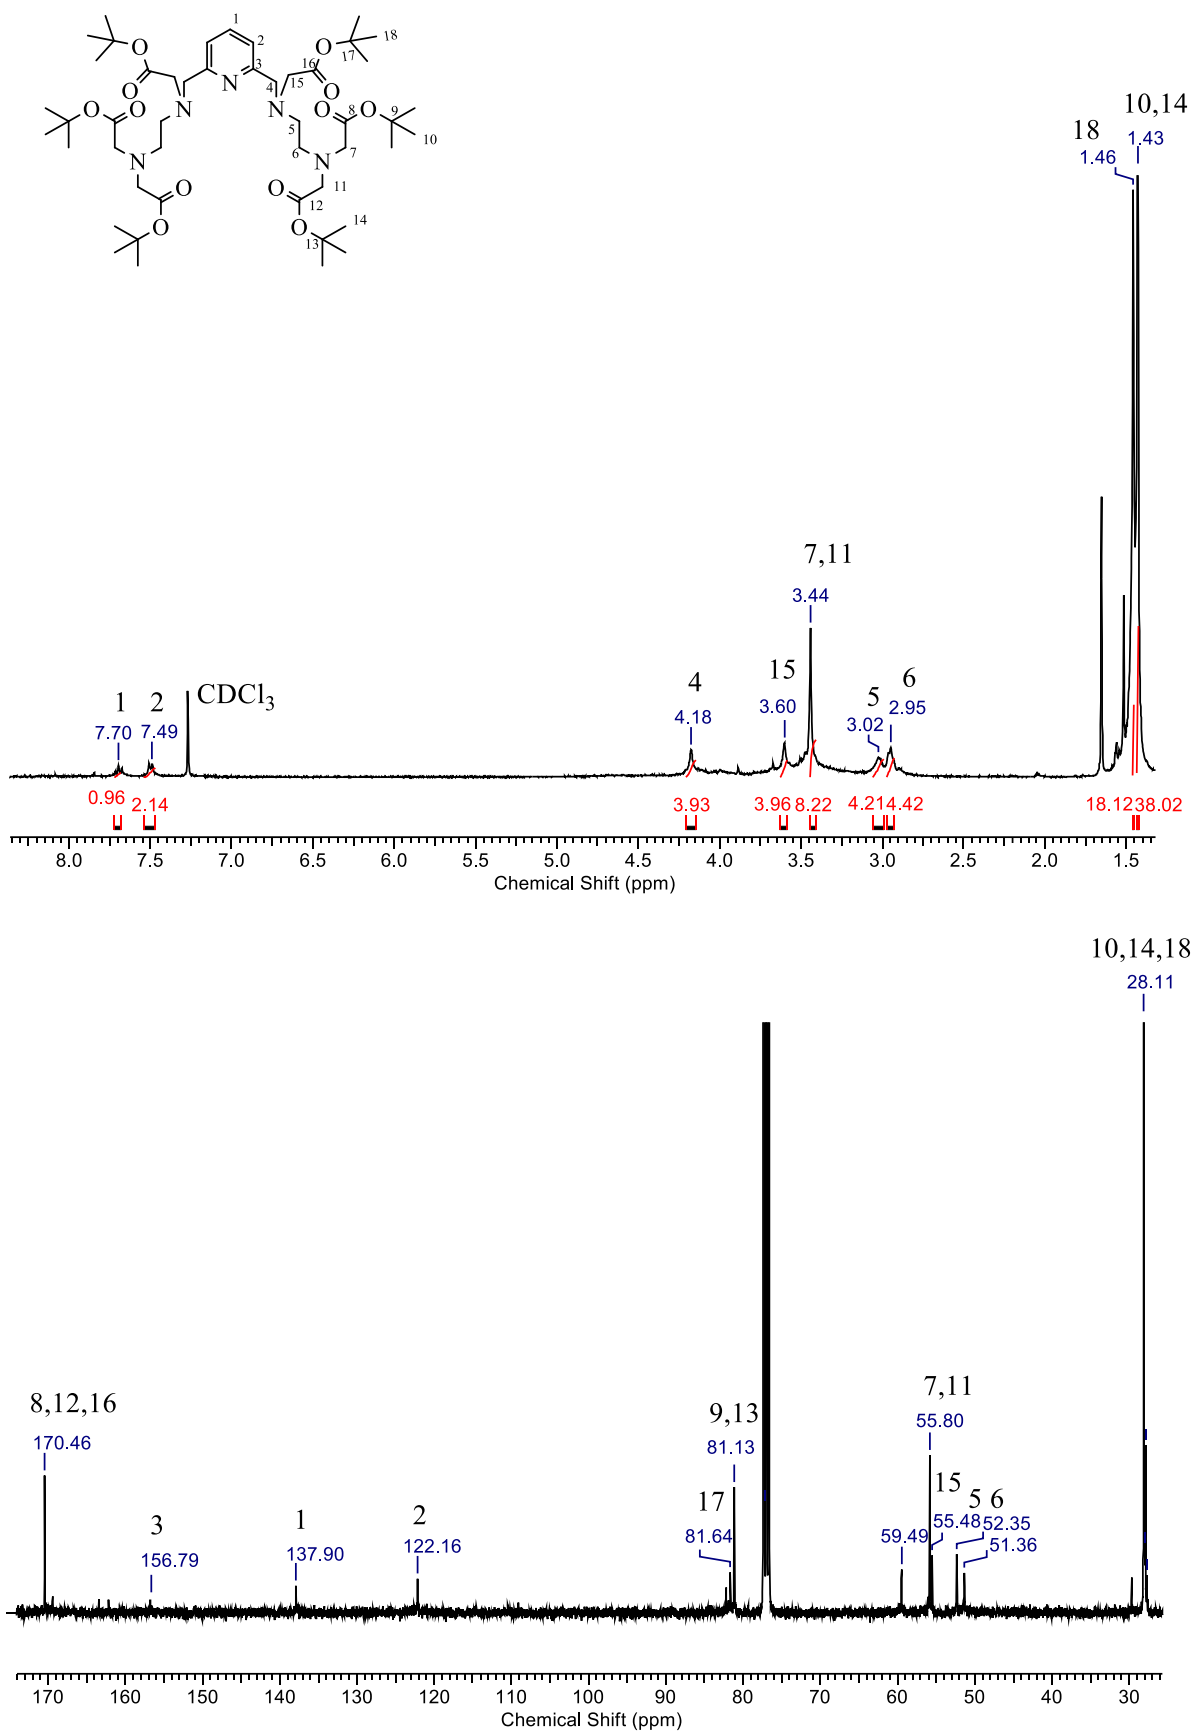

**Figure S7.** <sup>1</sup>H and <sup>13</sup>C NMR spectra of **6** in CDCl<sub>3</sub>.



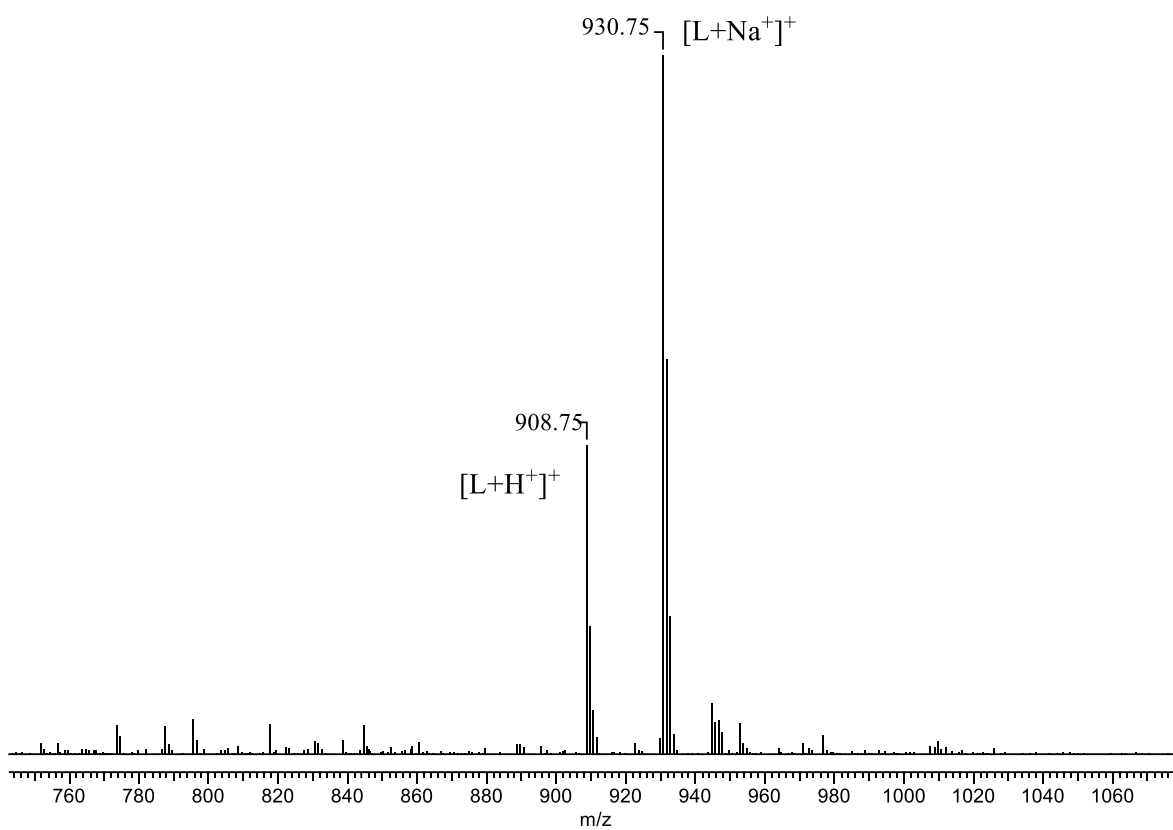

**Figure S8.** MS (ESI) spectrum of **6**.

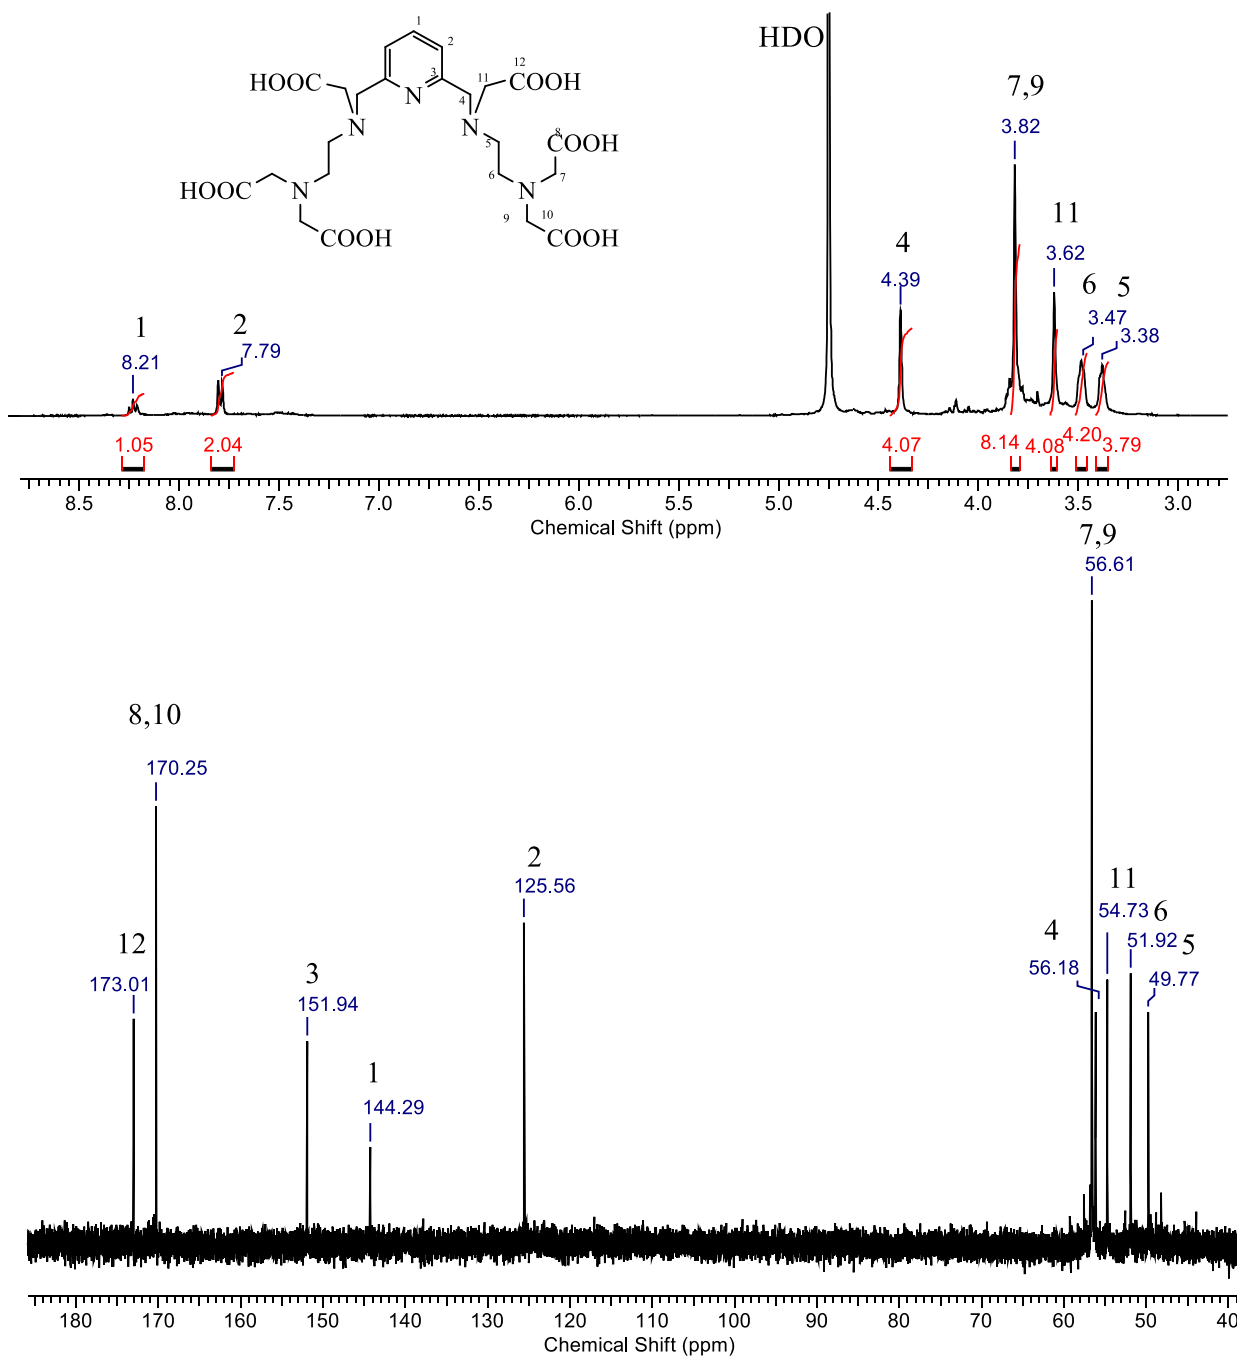

Figure S9. <sup>1</sup>H and <sup>13</sup>C NMR spectra of H<sub>6</sub>aPyha in D<sub>2</sub>O.

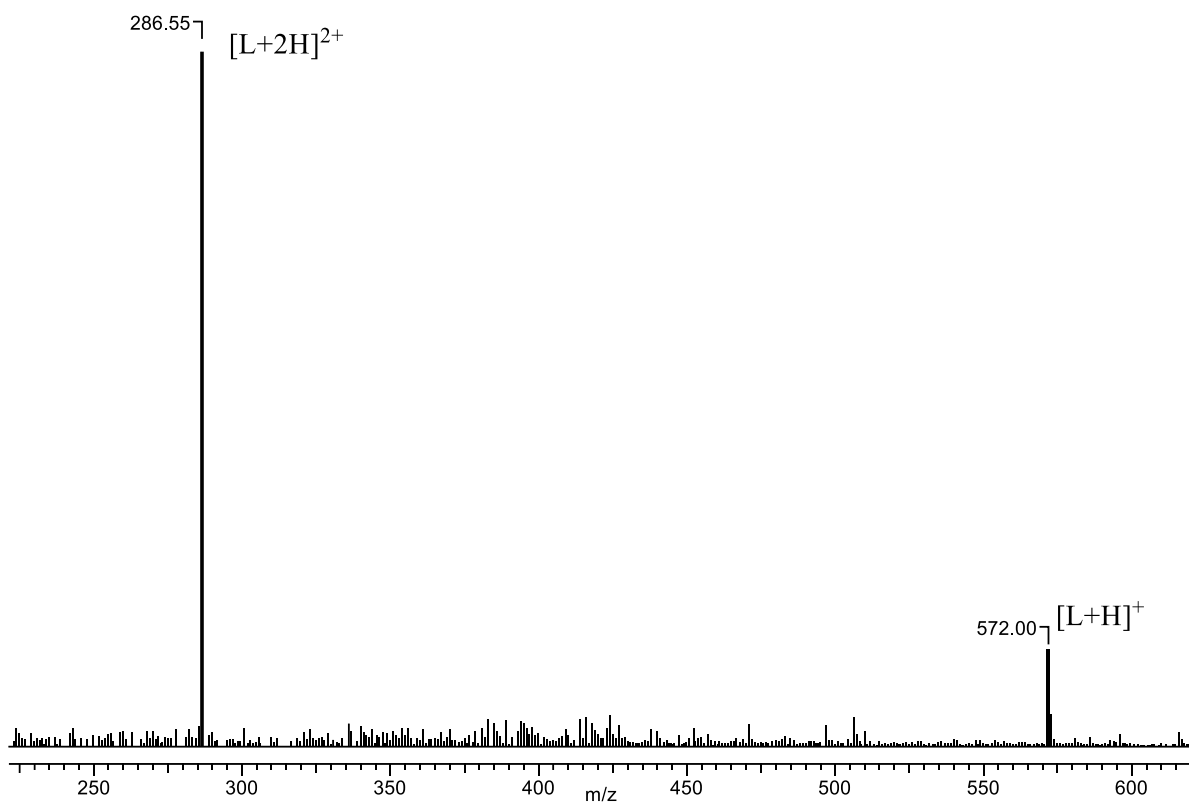

**Figure S10.** MS (ESI) spectrum of **H<sub>6a</sub>Pyha**.

## 2. Mass spectra of complexes

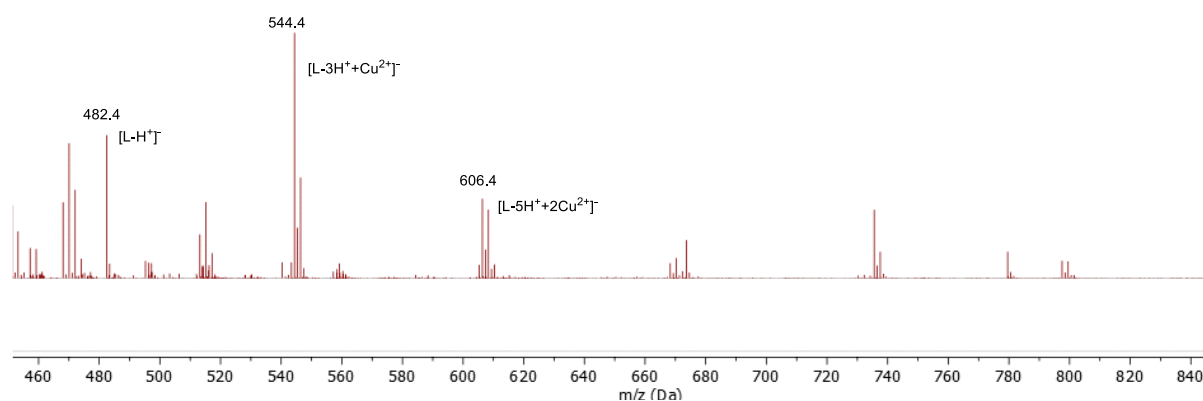

**Fig. S11** MS (MALDI TOF) spectra of the ligand **H<sub>4</sub>aPyta** in the presence of Cu<sup>2+</sup>.

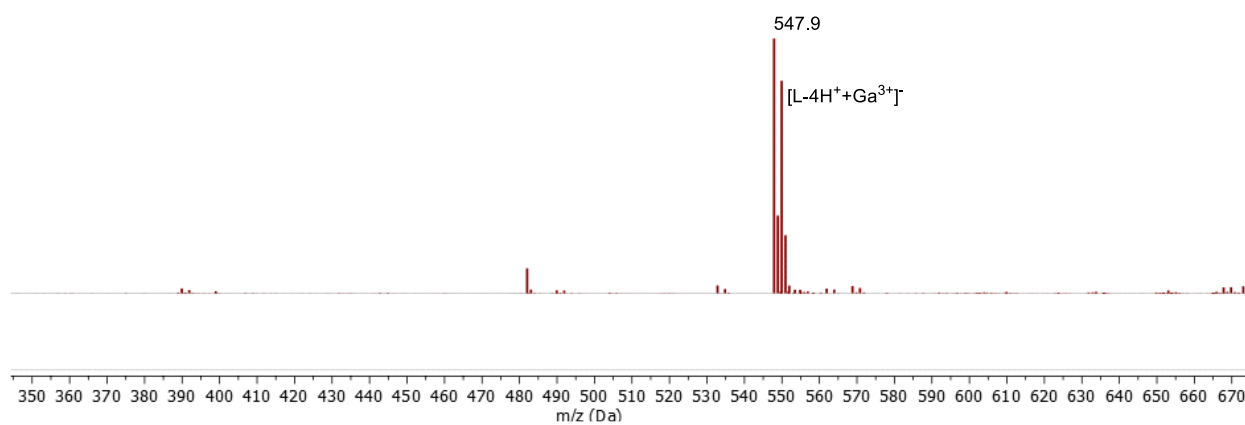

**Fig. S12** MS (MALDI TOF) spectrum of the ligand **H<sub>4</sub>aPyta** in the presence of Ga<sup>3+</sup>.

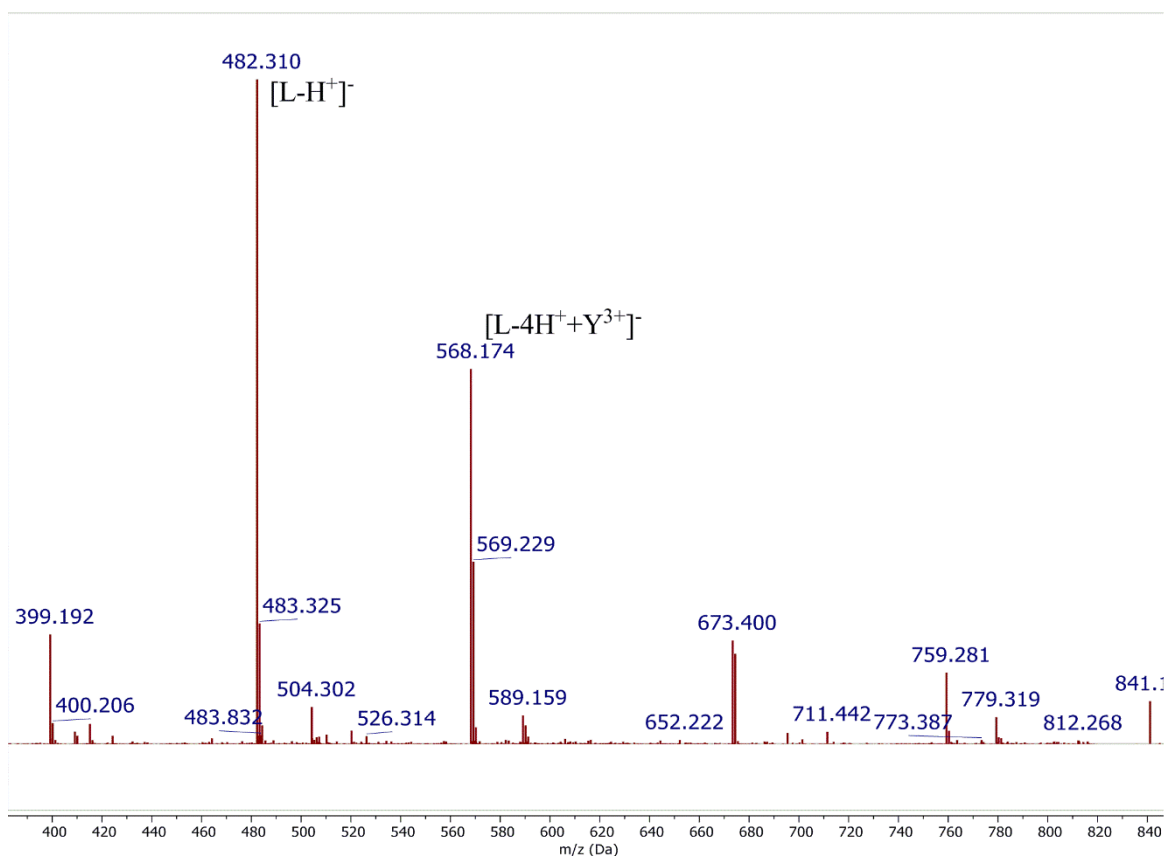

**Figure S13.** MS (MALDI TOF) spectrum of the ligand **H<sub>4a</sub>Pyta** in the presence of **Y<sup>3+</sup>**.

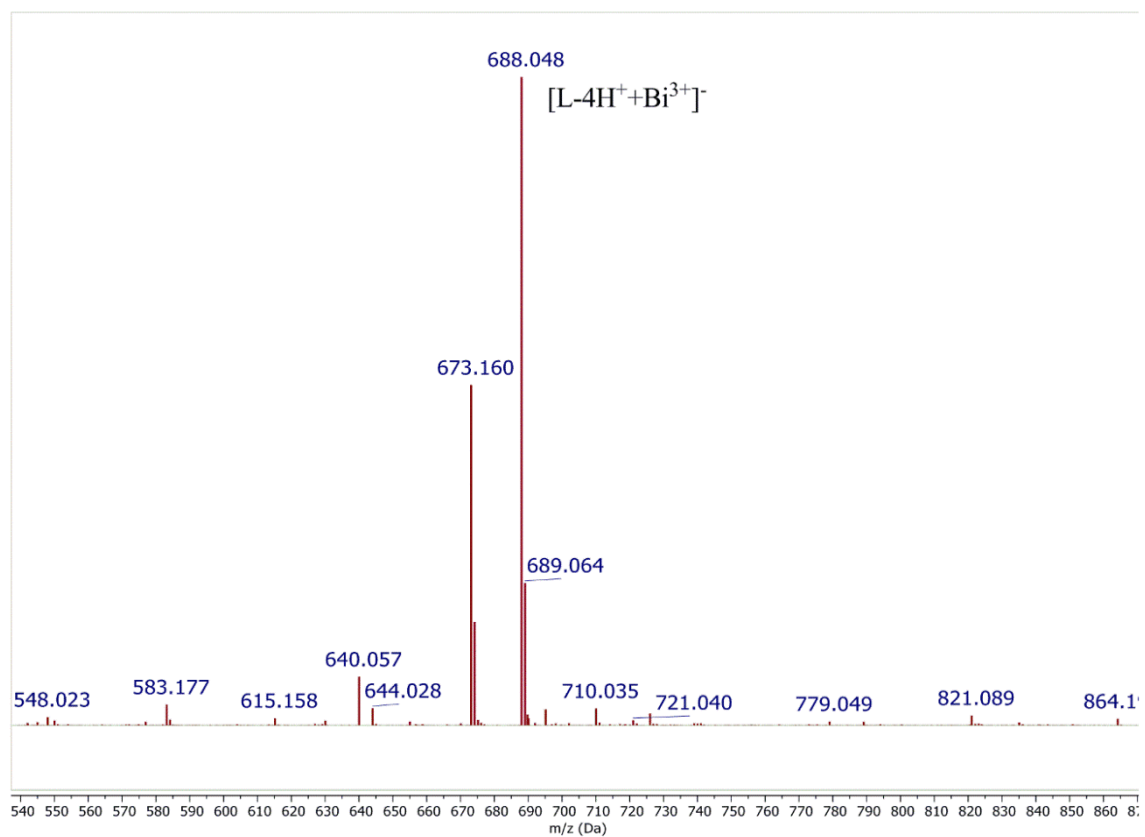

**Figure S14.** MS (MALDI TOF) spectrum of the ligand **H<sub>4a</sub>Pyta** in the presence of **Bi<sup>3+</sup>**.

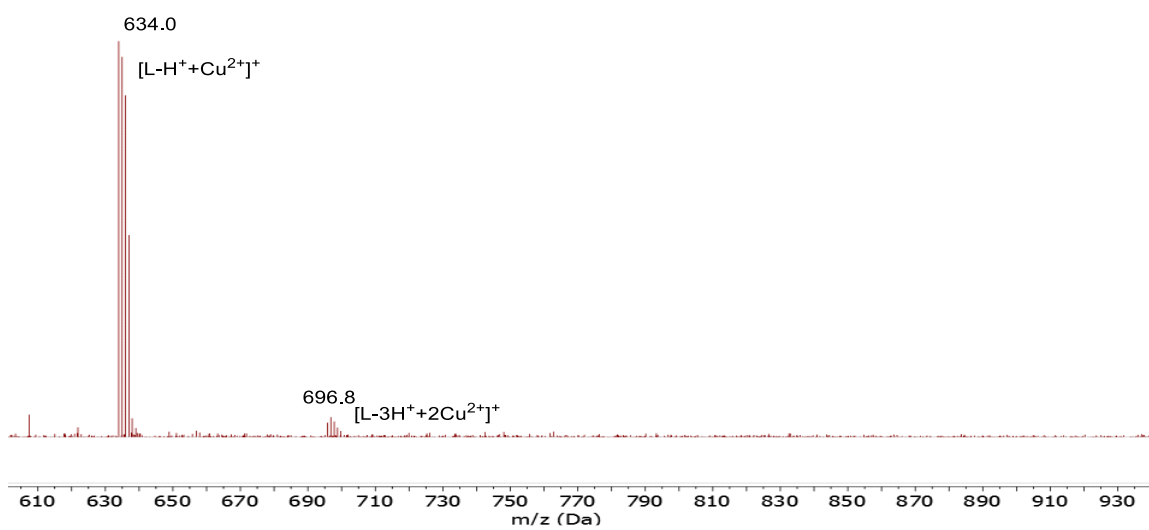

**Fig. S15** MS (MALDI TOF) spectra of the ligand **H<sub>6a</sub>Pyha** in the presence of Cu<sup>2+</sup>.

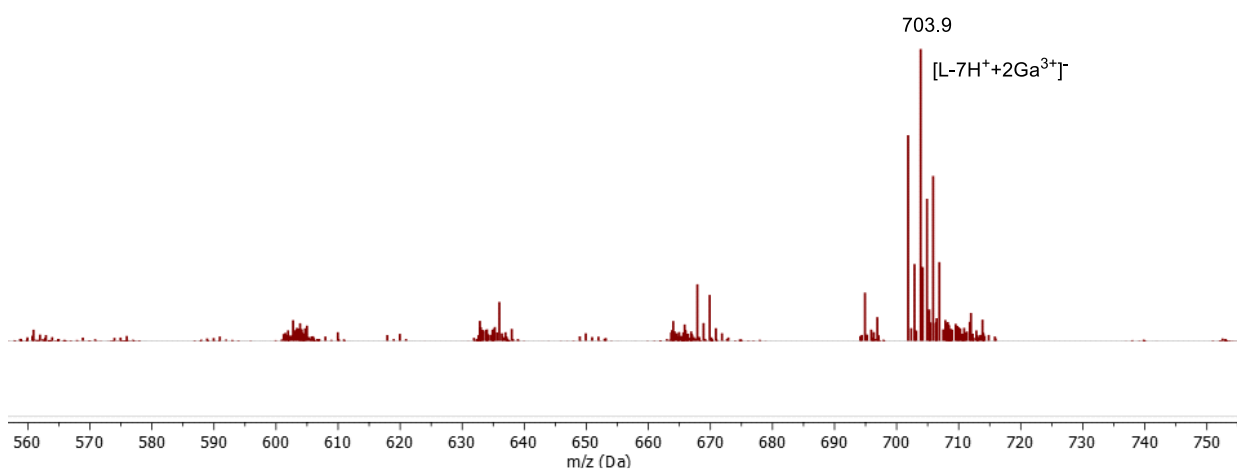

**Fig. S16** MS (MALDI TOF) spectrum of the ligand **H<sub>6a</sub>Pyha** in the presence of Ga<sup>3+</sup>.

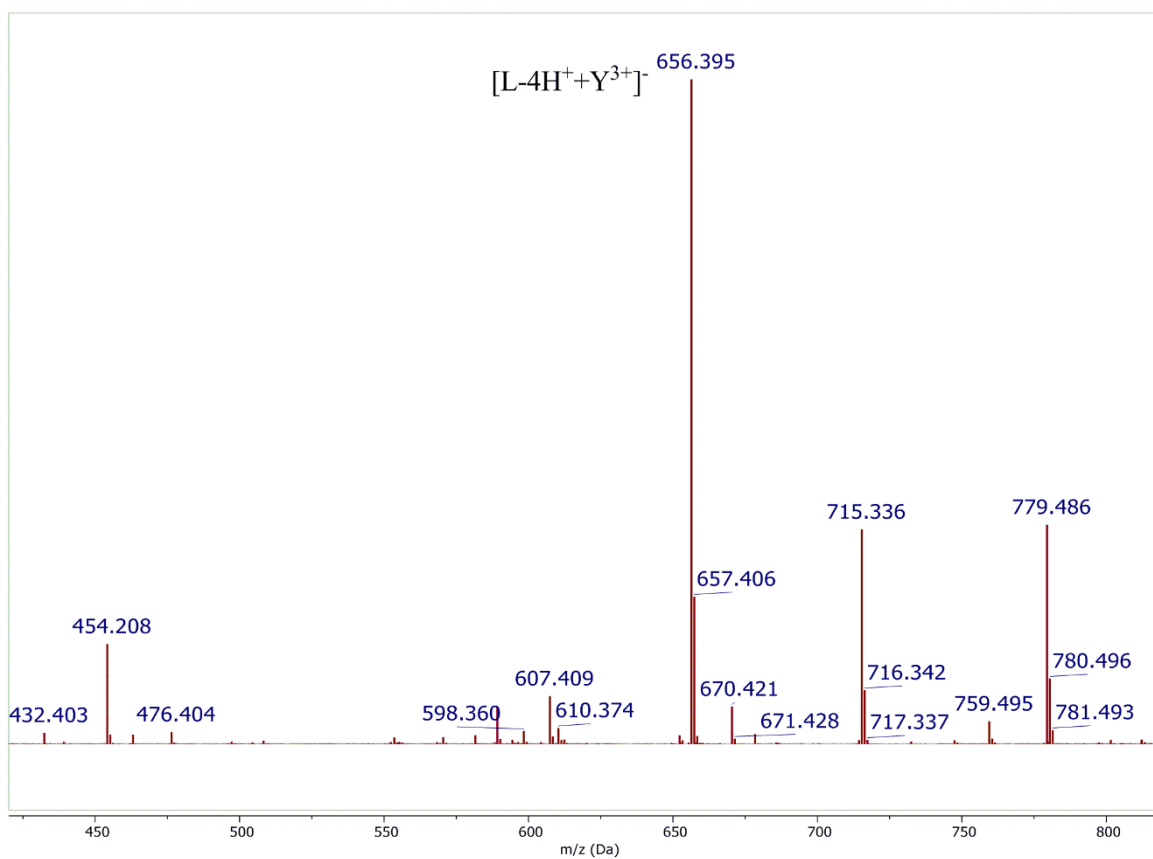

Figure S17. MS (MALDI TOF) spectrum of the ligand  $H_6aPyha$  in the presence of  $Y^{3+}$ .

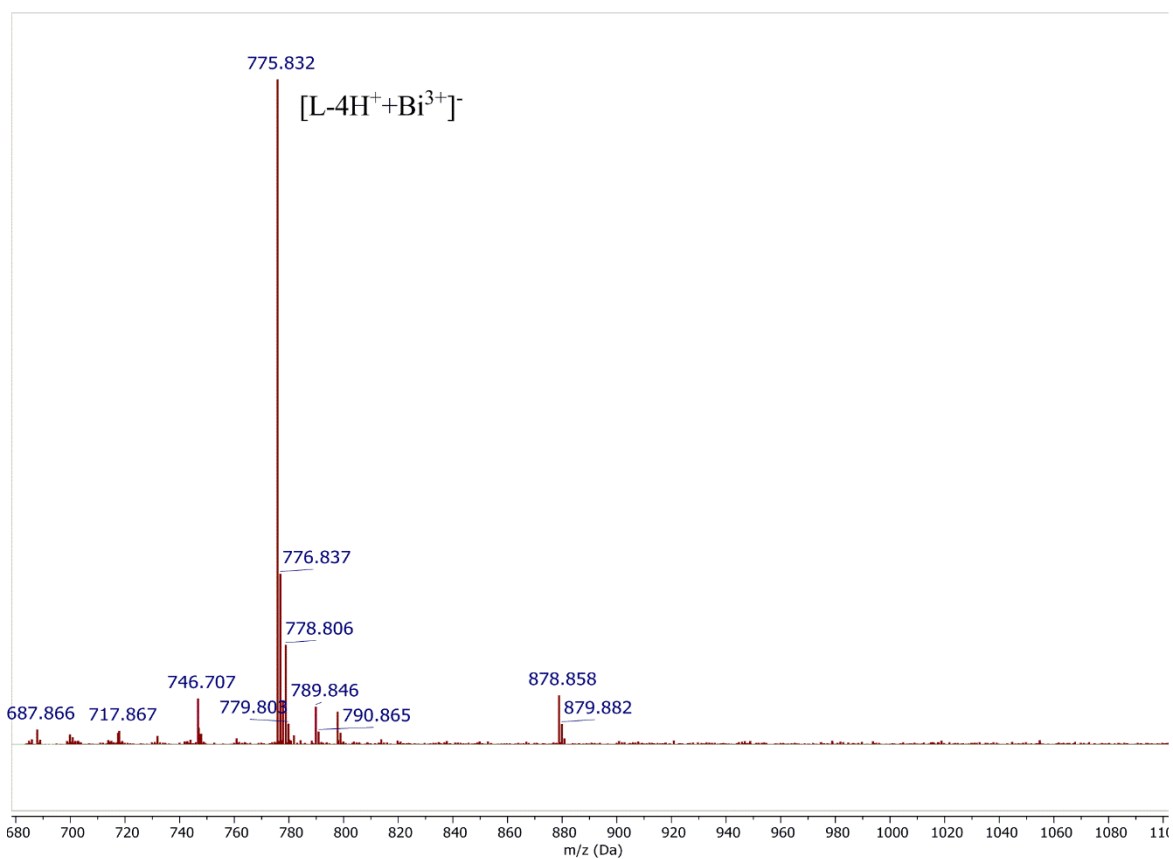

Figure S18. MS (MALDI TOF) spectrum of the ligand  $H_6aPyha$  in the presence of  $Bi^{3+}$ .

### 3. NMR study of ligand protonation and complex formation

**Table S1.**  $^1\text{H}$  NMR (400 MHz, 298 K) chemical shifts ( $\Delta\delta$ , ppm) of the ligand **H<sub>4</sub>aPyta** at different pH values in D<sub>2</sub>O. See Figure 2 for proton labeling.

| H <sub>4</sub> aPyta | pH   |                                |                                |                                |
|----------------------|------|--------------------------------|--------------------------------|--------------------------------|
|                      | 12   | 8.7                            | 7.3                            | 2.2                            |
| H <sub>1</sub>       | 8.09 | 8.11 ( $\Delta\delta = 0.02$ ) | 8.14 ( $\Delta\delta = 0.05$ ) | 8.15 ( $\Delta\delta = 0.06$ ) |
| H <sub>2</sub>       | 8.14 | 8.17 ( $\Delta\delta = 0.03$ ) | 8.18 ( $\Delta\delta = 0.04$ ) | 8.19 ( $\Delta\delta = 0.05$ ) |
| H <sub>5</sub>       | 3.47 | 3.66 ( $\Delta\delta = 0.19$ ) | 3.84 ( $\Delta\delta = 0.37$ ) | 3.87 ( $\Delta\delta = 0.40$ ) |
| H <sub>6</sub>       | 2.82 | 3.24 ( $\Delta\delta = 0.42$ ) | 3.54 ( $\Delta\delta = 0.74$ ) | 3.62 ( $\Delta\delta = 0.80$ ) |
| H <sub>7,9</sub>     | 3.24 | 3.59 ( $\Delta\delta = 0.35$ ) | 3.84 ( $\Delta\delta = 0.60$ ) | 4.04 ( $\Delta\delta = 0.80$ ) |

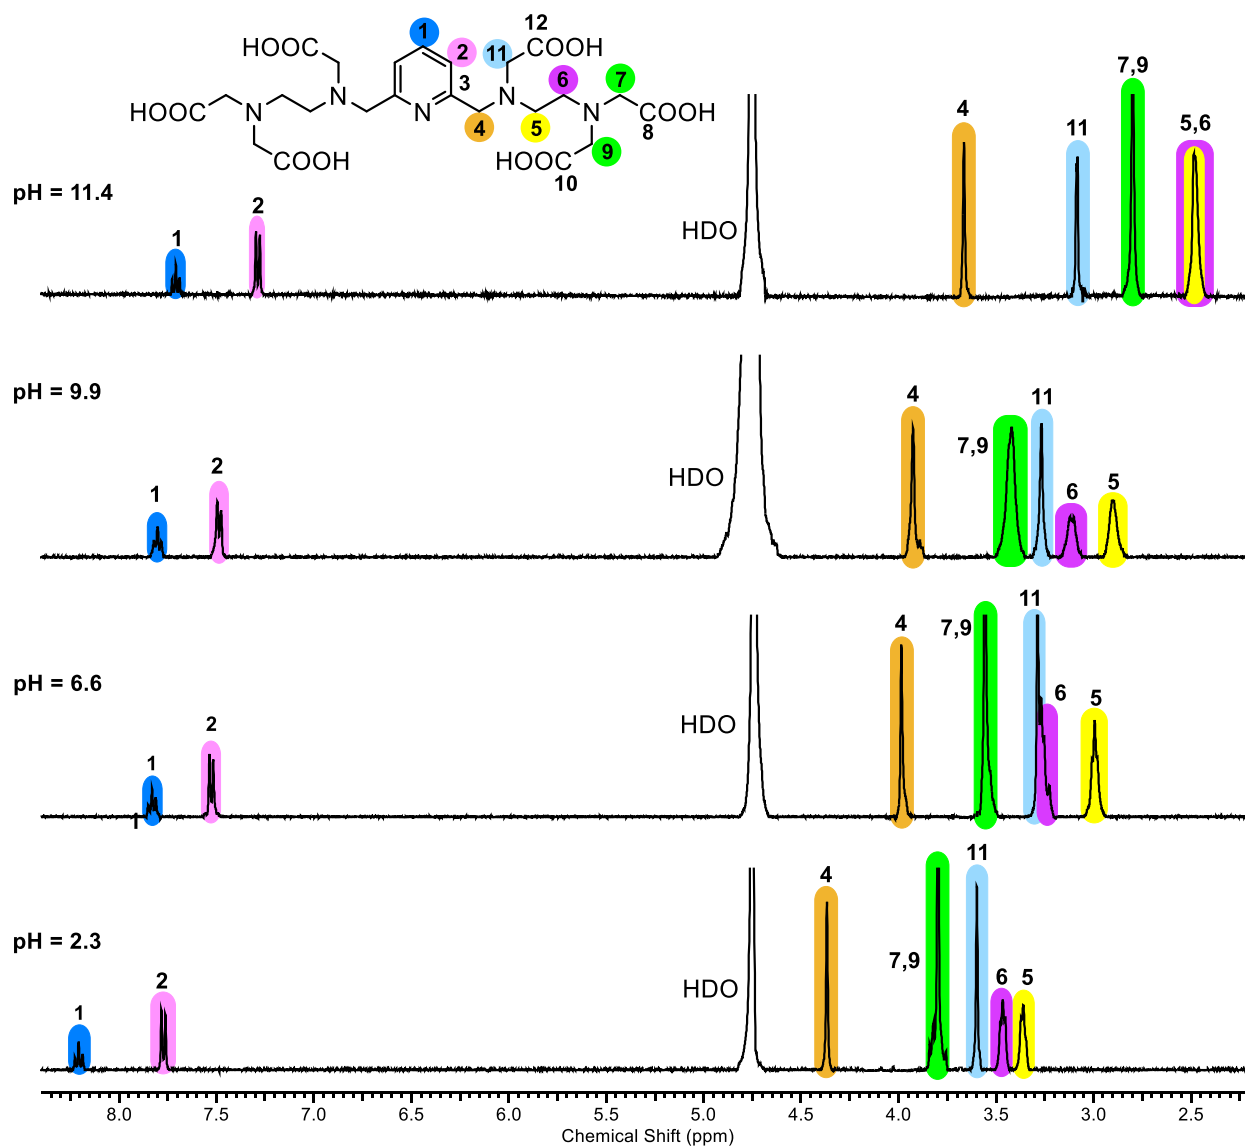

**Figure S19.**  $^1\text{H}$  NMR spectra of the ligand **H<sub>6</sub>aPyha** ( $C_L = 15$  mM) at different pH values in D<sub>2</sub>O.



**Table S2.**  $^1\text{H}$  NMR (400 MHz, 298 K) chemical shifts ( $\Delta\delta$ , ppm) of the ligand **H<sub>6a</sub>Pyha** at different pH values in D<sub>2</sub>O. See Figure S19 for proton labeling.

| H <sub>6a</sub> Pyha | pH   |                                |                                |                                |
|----------------------|------|--------------------------------|--------------------------------|--------------------------------|
|                      | 11.4 | 9.9                            | 6.6                            | 2.3                            |
| H <sub>1</sub>       | 7.71 | 7.80 ( $\Delta\delta = 0.09$ ) | 7.83 ( $\Delta\delta = 0.12$ ) | 8.21 ( $\Delta\delta = 0.50$ ) |
| H <sub>2</sub>       | 7.28 | 7.48 ( $\Delta\delta = 0.20$ ) | 7.52 ( $\Delta\delta = 0.24$ ) | 7.76 ( $\Delta\delta = 0.48$ ) |
| H <sub>4</sub>       | 3.66 | 3.93 ( $\Delta\delta = 0.27$ ) | 3.99 ( $\Delta\delta = 0.33$ ) | 4.37 ( $\Delta\delta = 0.71$ ) |
| H <sub>5</sub>       | 2.48 | 2.90 ( $\Delta\delta = 0.42$ ) | 2.99 ( $\Delta\delta = 0.51$ ) | 3.36 ( $\Delta\delta = 0.88$ ) |
| H <sub>6</sub>       | 2.48 | 3.11 ( $\Delta\delta = 0.63$ ) | 3.25 ( $\Delta\delta = 0.77$ ) | 3.47 ( $\Delta\delta = 0.99$ ) |
| H <sub>7,9</sub>     | 2.80 | 3.42 ( $\Delta\delta = 0.62$ ) | 3.56 ( $\Delta\delta = 0.76$ ) | 3.80 ( $\Delta\delta = 1.00$ ) |
| H <sub>11</sub>      | 3.08 | 3.27 ( $\Delta\delta = 0.19$ ) | 3.29 ( $\Delta\delta = 0.21$ ) | 3.60 ( $\Delta\delta = 0.52$ ) |

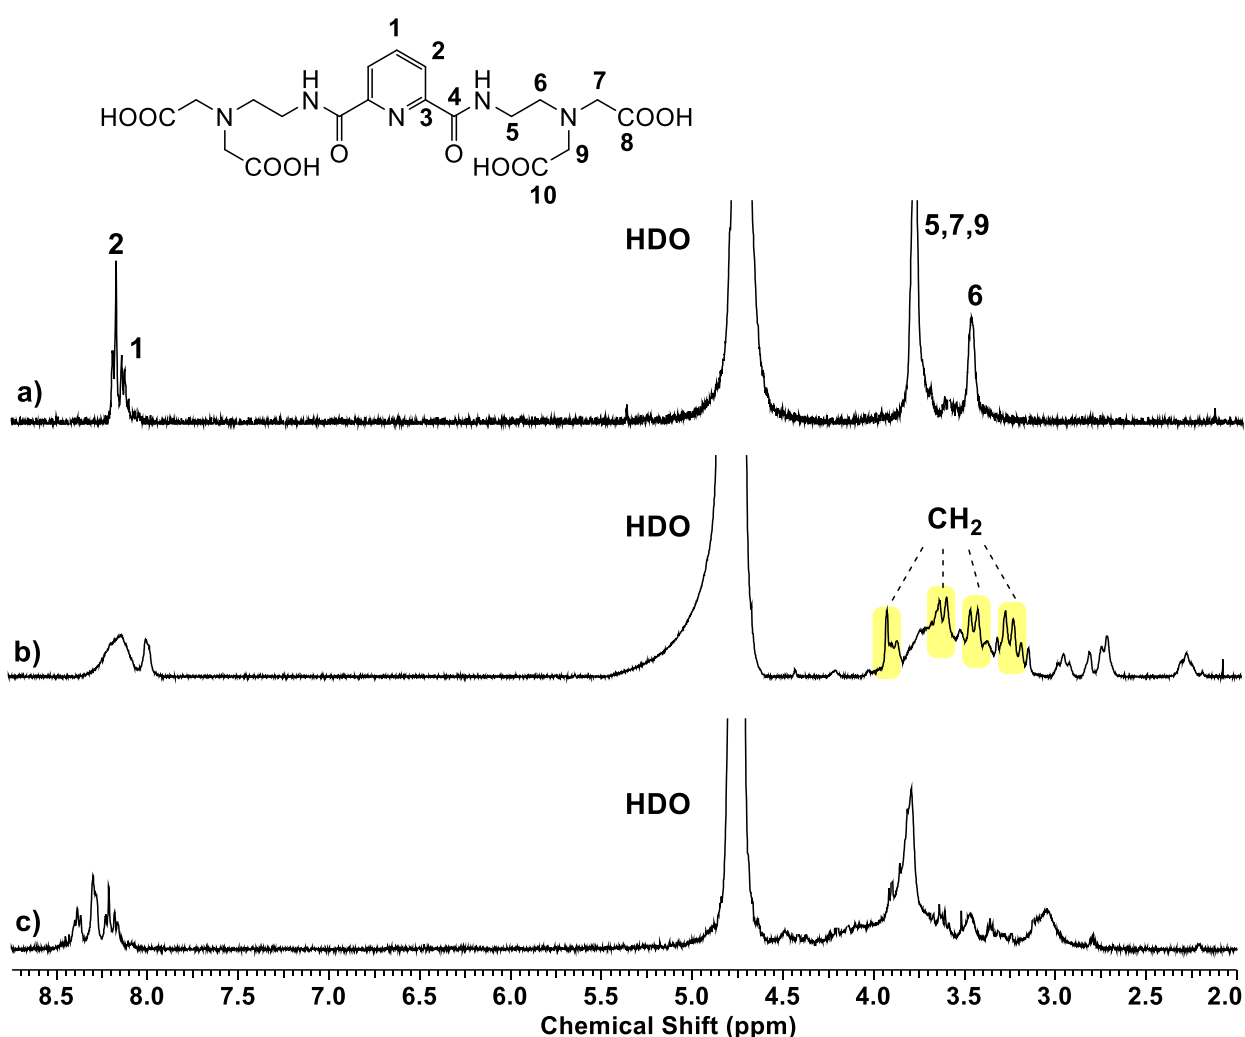

**Figure S20.**  $^1\text{H}$  NMR spectra of: a) **H<sub>4a</sub>Pyta** ( $C_L = 10$  mM, pH=7.1), b) **H<sub>4a</sub>Pyta** in the presence of  $\text{Y}^{3+}$  (pH=7.2), c) **H<sub>4a</sub>Pyta** in the presence of  $\text{Bi}^{3+}$  (pH=7.5) in D<sub>2</sub>O.

#### 4. HPLC of complexes

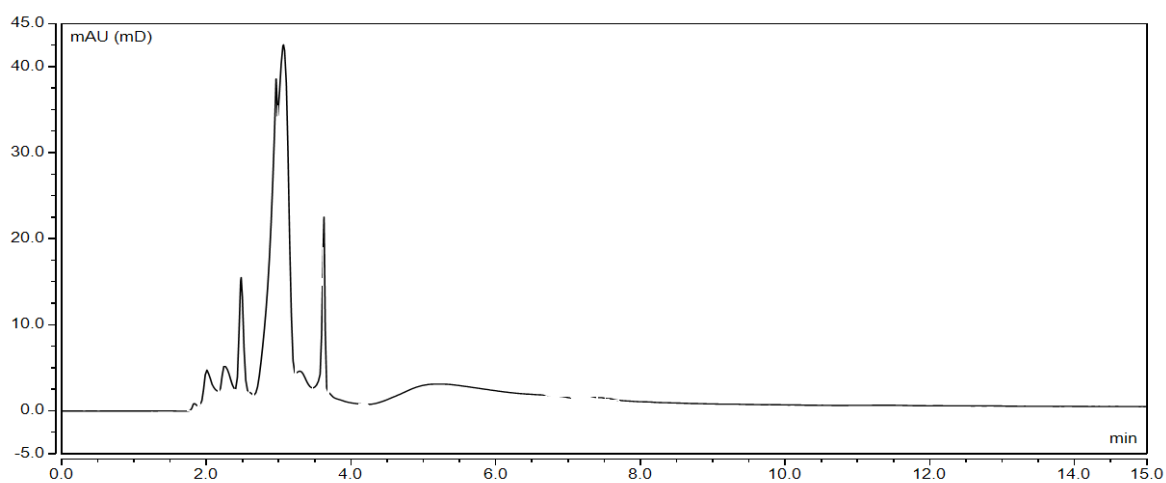

**Figure S21.** HPLC of H<sub>4</sub>aPyta in the presence of Cu<sup>3+</sup> ( $t_r=2.482, 3.067$  min).

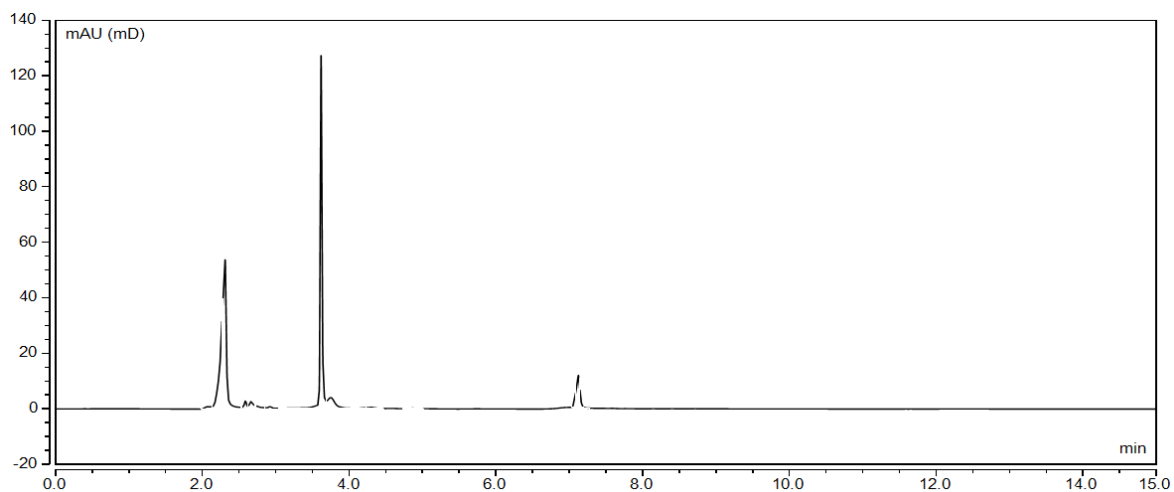

**Figure S22.** HPLC of H<sub>4</sub>aPyta in the presence of Y<sup>3+</sup> ( $t_r=2.310$  min).

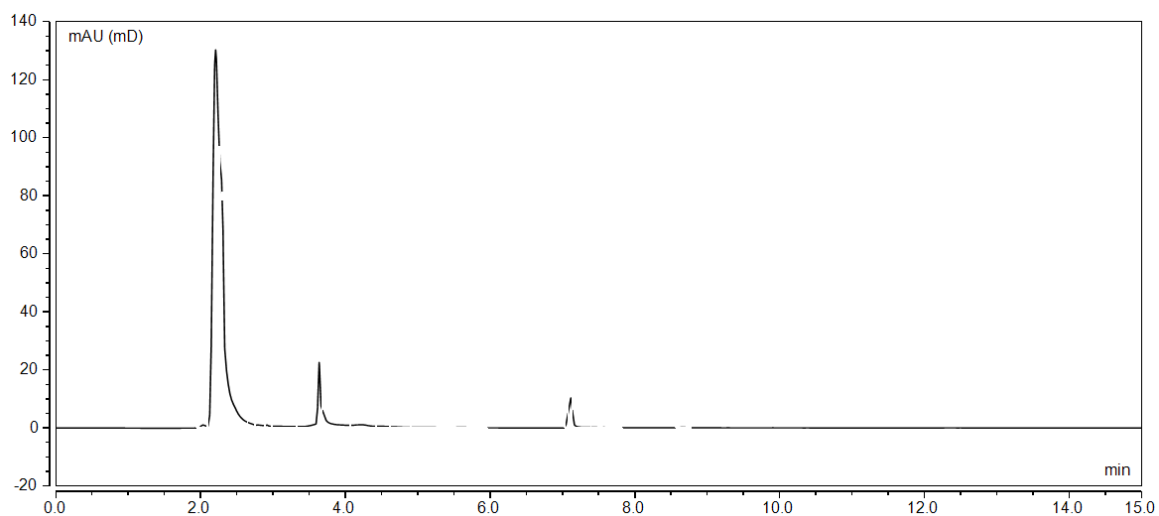

**Figure S23.** HPLC of H<sub>4</sub>aPyta in the presence of Bi<sup>3+</sup> ( $t_r=2.208$  min).

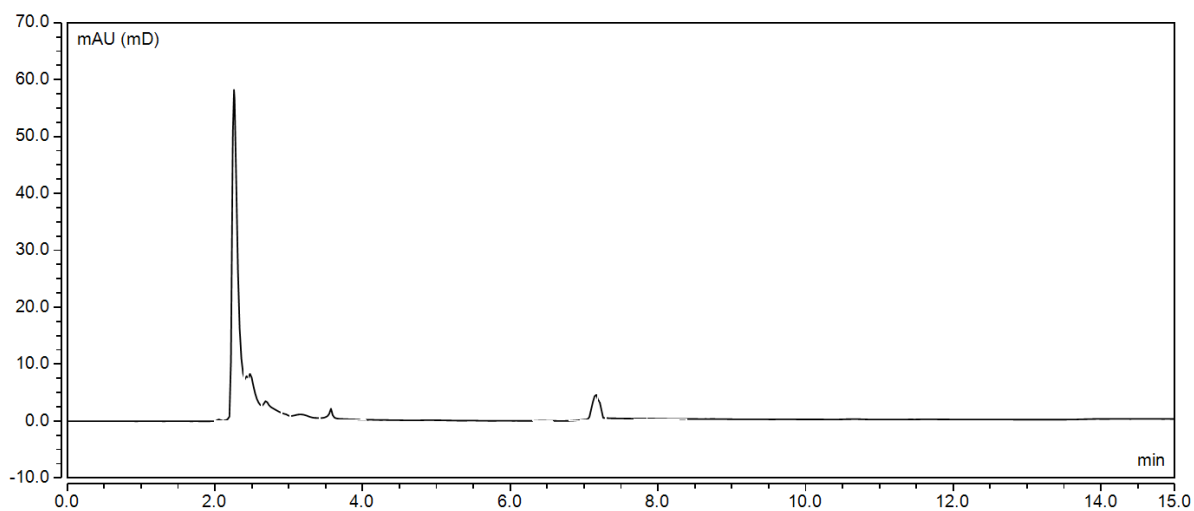

**Figure S24.** HPLC of H<sub>6</sub>aPyha in the presence of Cu<sup>2+</sup> ( $t_r=2.260$  min).

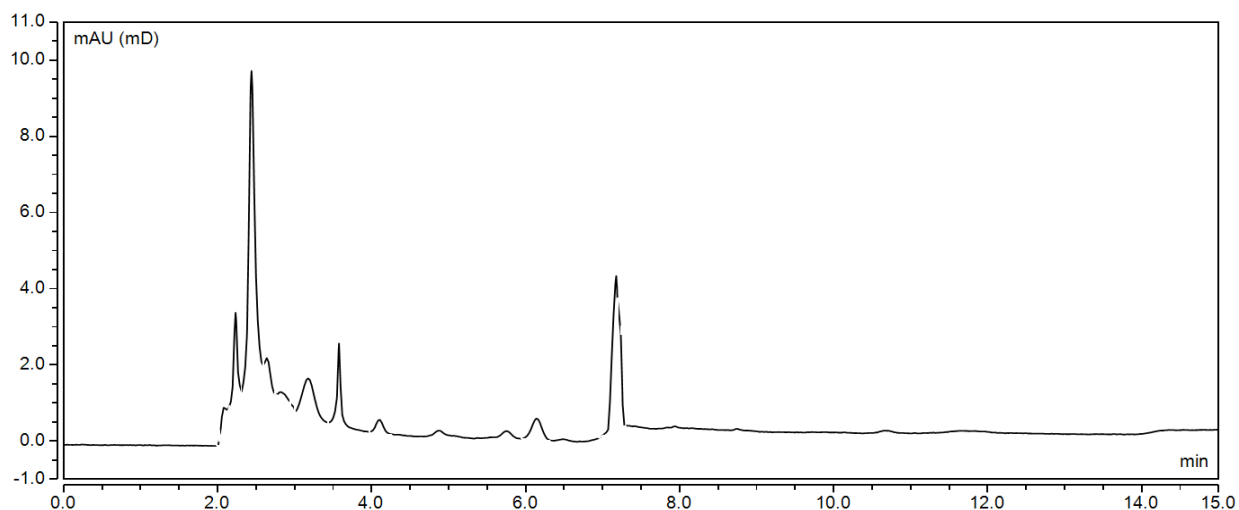

**Figure S25.** HPLC of H<sub>6</sub>aPyha in the presence of Y<sup>3+</sup> ( $t_r=2.440$  min).

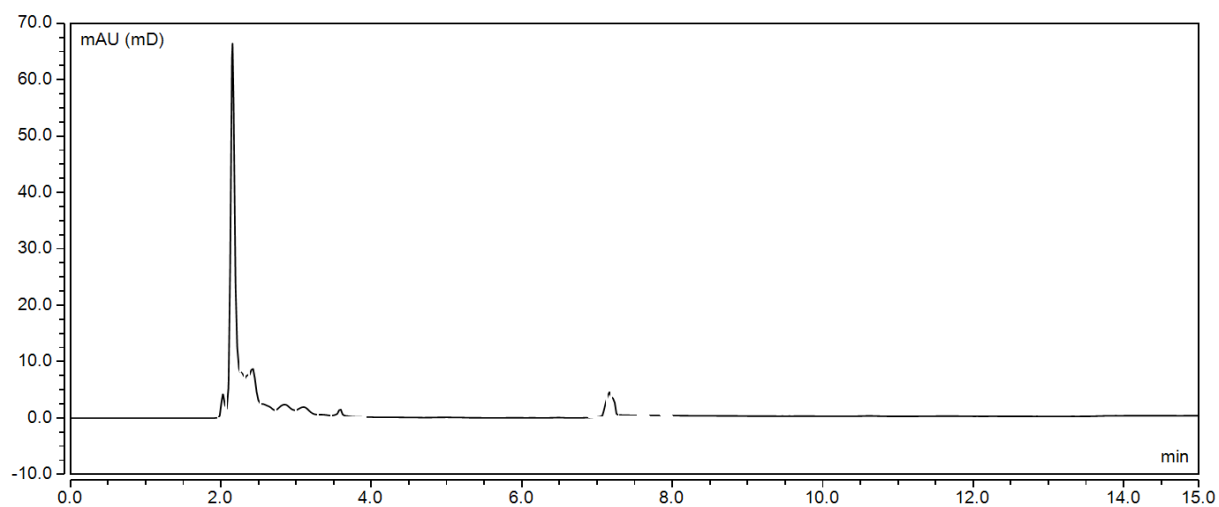

**Figure S26.** HPLC of H<sub>6</sub>aPyha in the presence of Bi<sup>3+</sup> ( $t_r=2.155$  min).

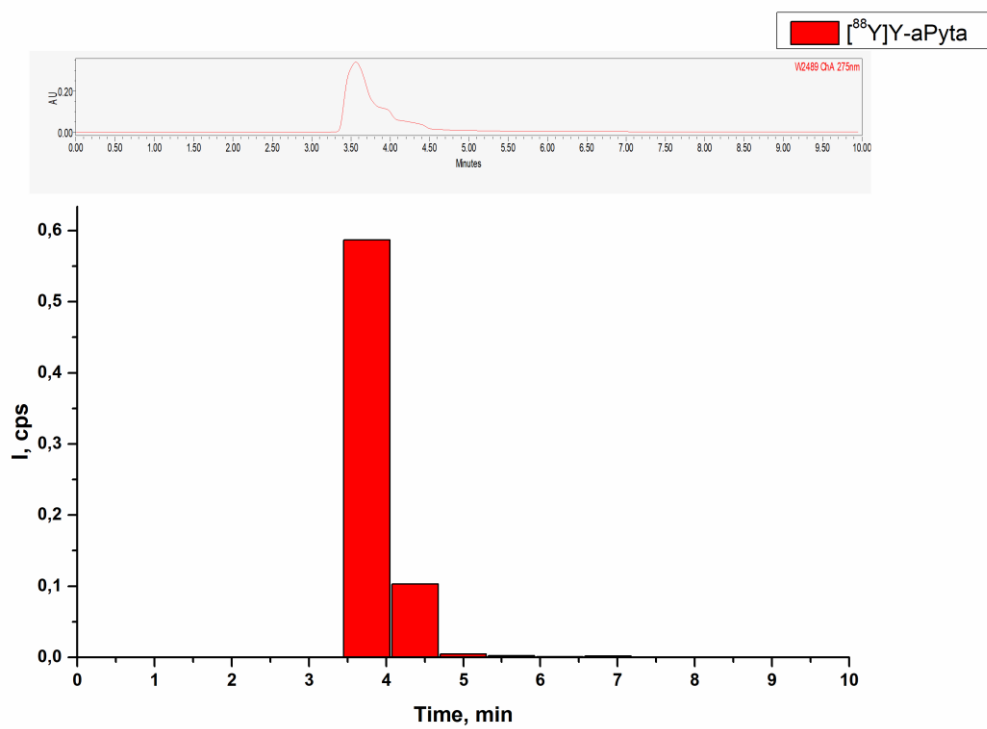

**Figure S27.** HPLC chromatogram obtained by UV-vis absorption detector and radioactivity measurements of  $\text{H}_4\text{aPyta}$  complexes with  $[^{88}\text{Y}]\text{Y}^{3+}$ .

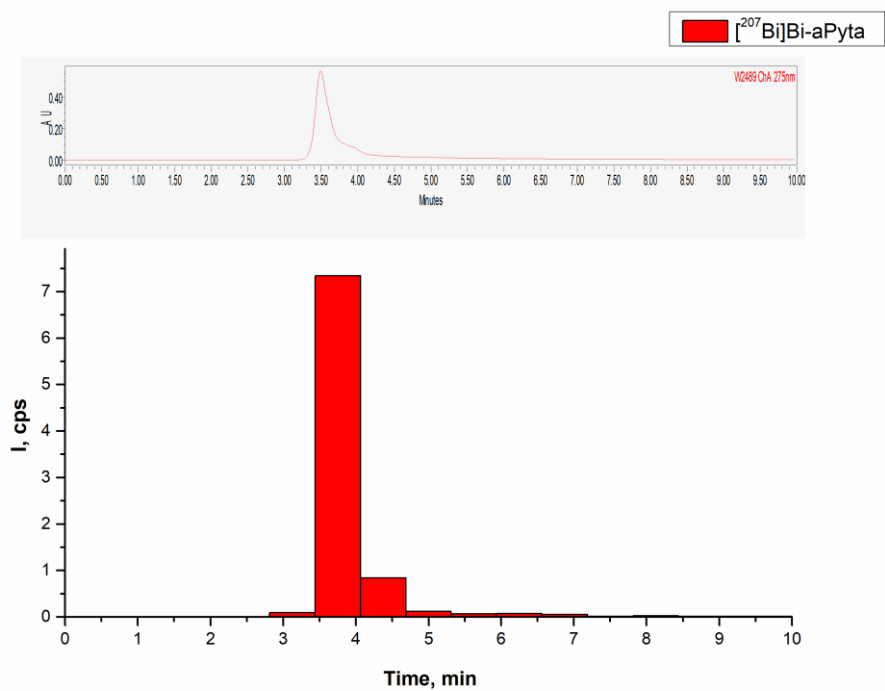

**Figure S28.** HPLC chromatogram obtained by UV-vis absorption detector and radioactivity measurements of  $\text{H}_4\text{aPyta}$  complexes with  $[^{207}\text{Bi}]\text{Bi}^{3+}$ .

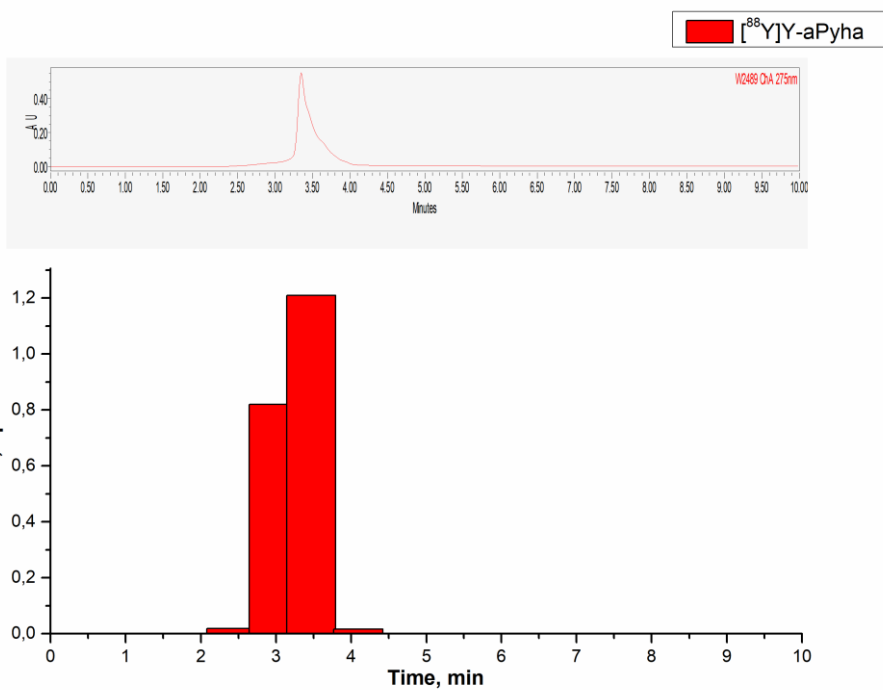

**Figure S29.** HPLC chromatograms obtained by UV-vis absorption detector and radioactivity measurements of  $\text{H}_6\text{aPyha}$  complexes with  $[^{88}\text{Y}]\text{Y}^{3+}$ .

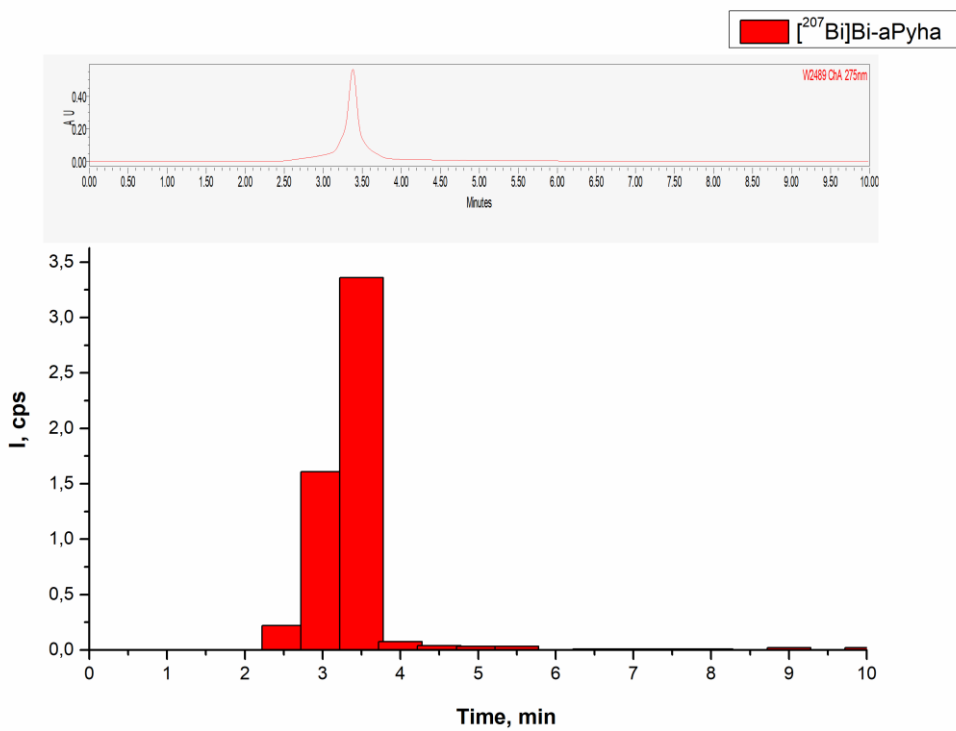

**Figure S30.** HPLC chromatograms obtained by UV-vis absorption detector and radioactivity measurements of  $\text{H}_6\text{aPyha}$  complexes with  $[^{207}\text{Bi}]\text{Bi}^{3+}$ .

## 5. DFT calculations

### QTAIM analysis

We have performed a QTAIM analysis to investigate the Ga coordination in the **Ga-aPyta** complex. We may conclude the Ga ion is 6-coordinated with four oxygen and two nitrogen atoms (Table S3, Figure S31).

**Table S3.** The parameters of bond critical points (3,-1).

| Bond | $\rho$ | $\nabla^2\rho$ | dH      |
|------|--------|----------------|---------|
| Me-N | 0.0381 | 0.0734         | -0.0079 |
| Me-N | 0.0387 | 0.0716         | -0.0079 |
| Me-O | 0.1000 | 0.4810         | -0.0234 |
| Me-O | 0.1024 | 0.4951         | -0.0251 |
| Me-O | 0.1000 | 0.4771         | -0.0239 |
| Me-O | 0.0990 | 0.4732         | -0.0230 |

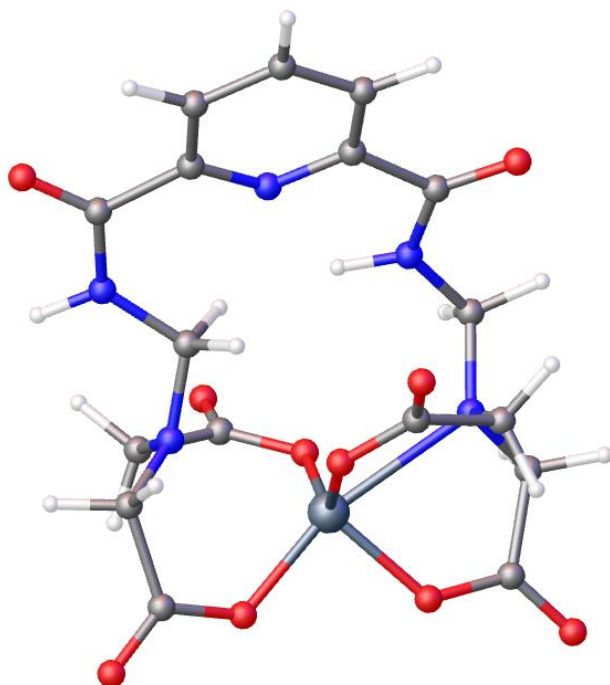

**Figure S31.** Geometries of complex **Ga-aPyta** calculated by the DFT method.

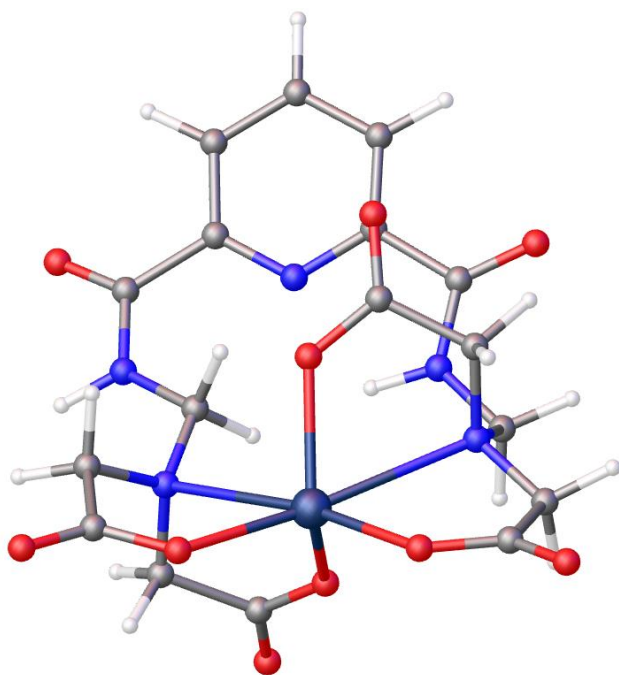

**Figure S32.** Geometries of complex **Y-aPyta** calculated by the DFT method.

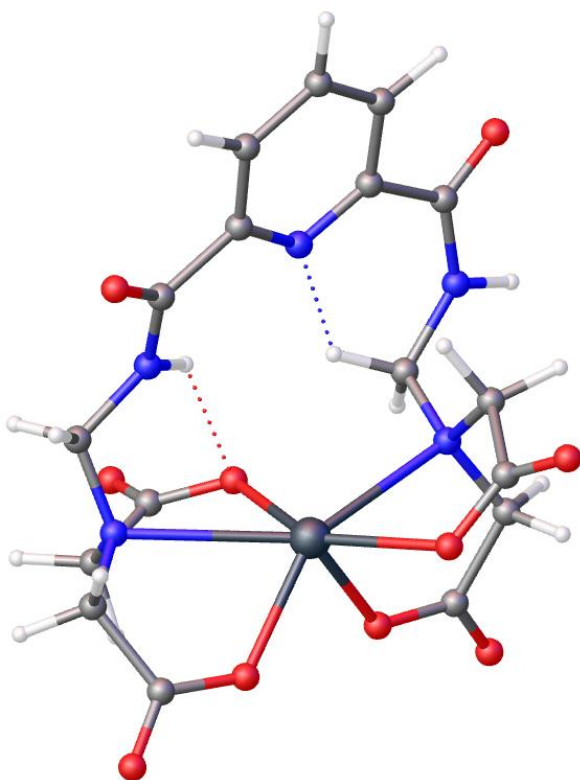

**Figure S33.** Geometries of complex **Bi-aPyta** calculated by the DFT method.

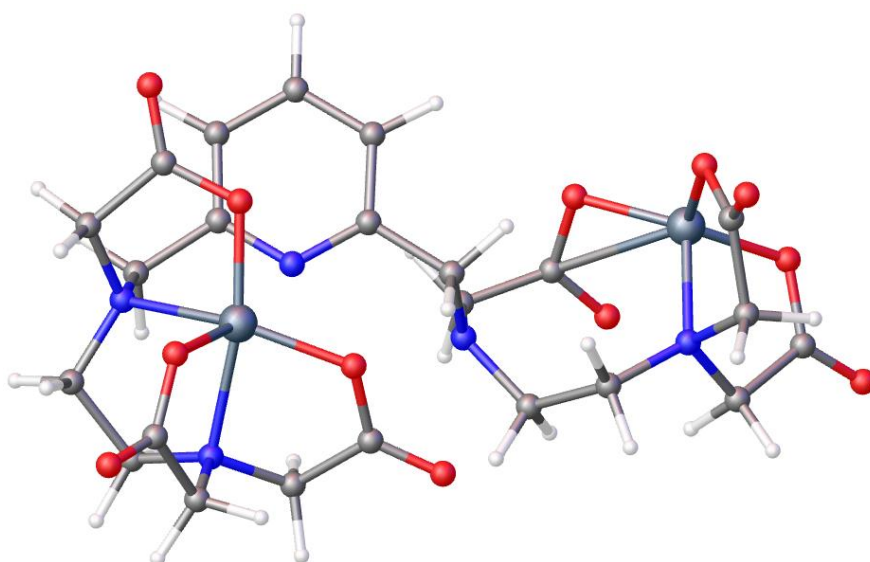

**Figure S34.** Geometries of complex **Ga<sub>2</sub>-aPyha** calculated by the DFT method.



## 6. Radiolabeling

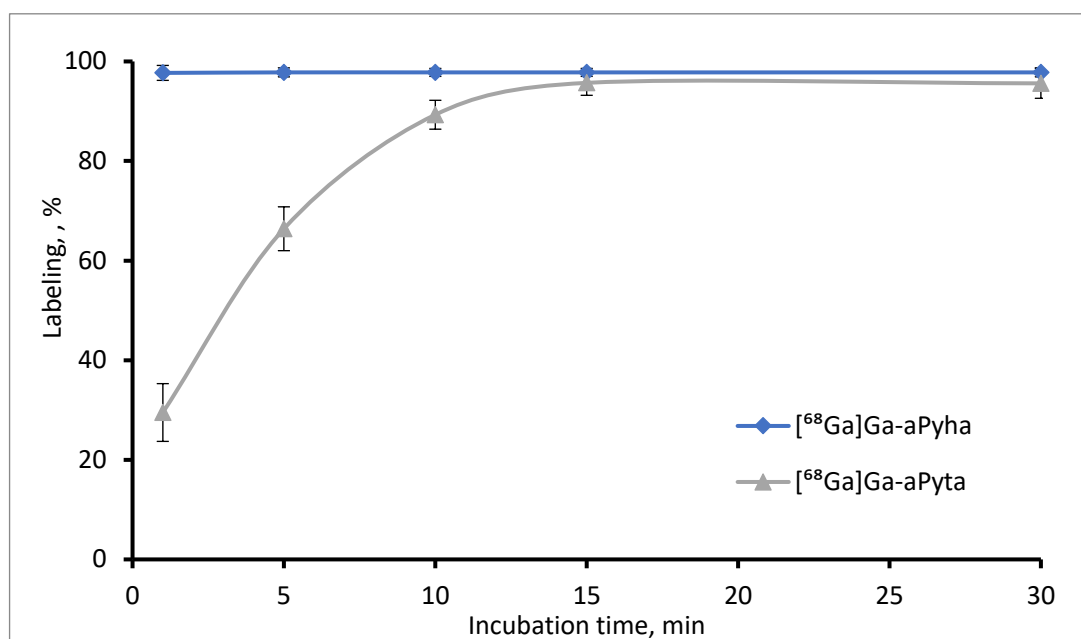

Figure S35. Time dependences of [<sup>68</sup>Ga]Ga-aPyta and [<sup>68</sup>Ga]Ga-aPyha formation (95°C, pH 5).

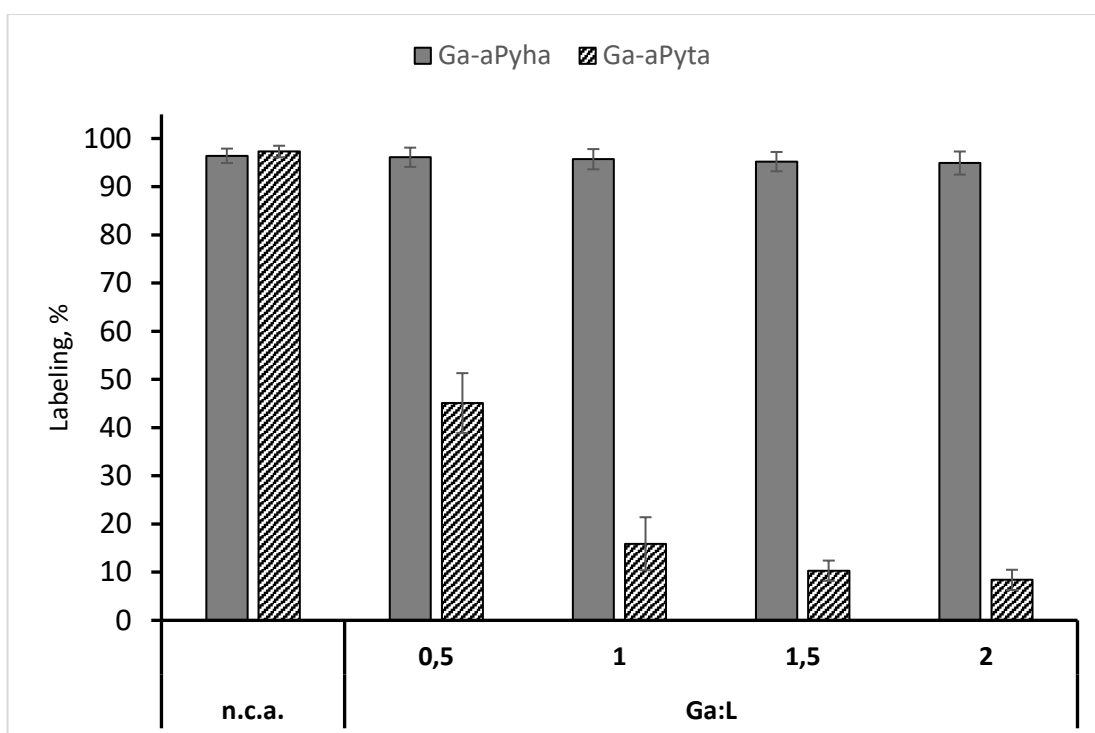

Figure S36. Influence of metal:ligand ratio on the yield of complexation reaction of H<sub>4</sub>aPyta and H<sub>6</sub>aPyha with <sup>68</sup>Ga (95°C, pH 5).

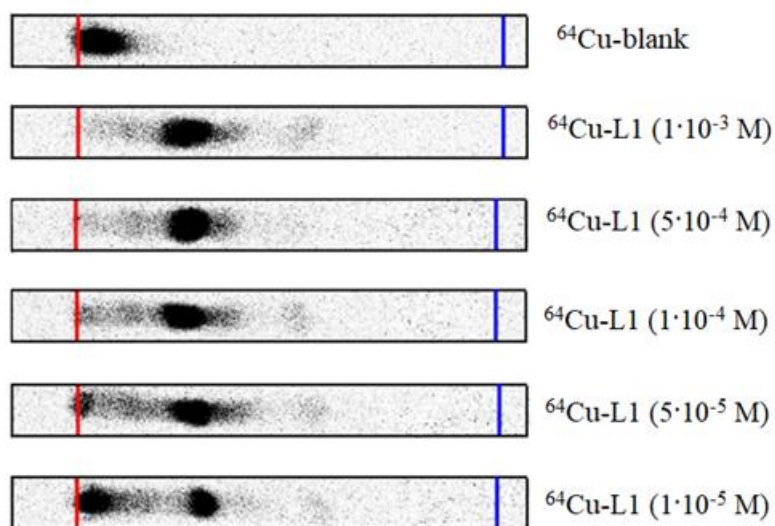

**Figure S37.** The image of TLC plates (Al-backed SiO<sub>2</sub> plates) after elution (20% NH<sub>4</sub>Cl/MeOH =1/1) of <sup>64</sup>Cu complexes with H<sub>6</sub>aPyha. Red – start line, blue – front line.

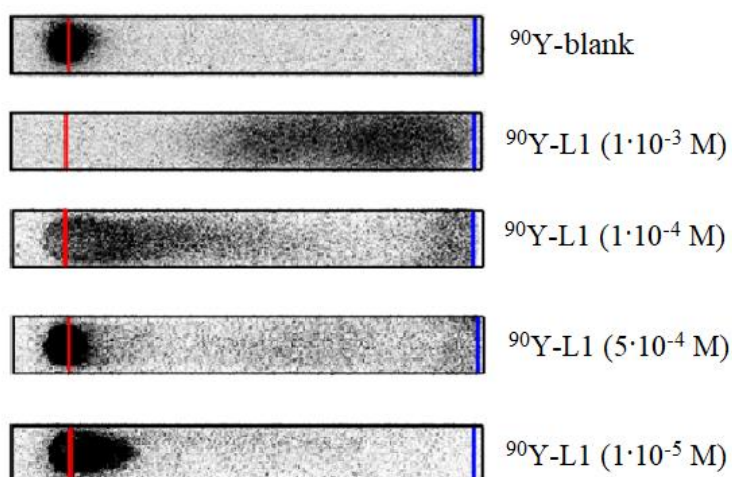

**Figure S38.** The image of “Whatman” sheets after elution (20% NH<sub>4</sub>Cl/MeOH =3/7) of <sup>90</sup>Y complexes with H<sub>6</sub>aPyha. Red – start line, blue – front line.

## 7. *In vitro* stability

**Table S4.** Stability of labelled **H<sub>6</sub>aPyha** complex <sup>207</sup>Bi in the presence of serum proteins.

| Incubation time | Intact [ <sup>207</sup> Bi]Bi-aPyha complex, % |
|-----------------|------------------------------------------------|
| 0 min           | 92,87356                                       |
| 30 min          | 84,53159                                       |
| 1 h             | 86,99552                                       |
| 2 h             | 85,7997                                        |
| 3 h             | 83,10912                                       |
| 4 h             | 90,58296                                       |
| 6 h             | 89,98505                                       |
| 1 d             | 97,3262                                        |
| 2 d             | 103,908                                        |
| 3 d             | 83,21839                                       |
| 4 d             | 90,55258                                       |
| 8 d             | 98,75223                                       |

## 8. Potentiometry

**Table S5.** Stepwise protonation constants (LogK) of the **aPyta<sup>4-</sup>** and **aPyha<sup>6-</sup>**.

| Reaction equations                                                                     | LogK  |
|----------------------------------------------------------------------------------------|-------|
| $\text{aPyta}^{4-} + \text{H}^+ \leftrightarrow \text{HaPyta}^{3-}$                    | 9.19  |
| $\text{HaPyta}^{3-} + \text{H}^+ \leftrightarrow \text{H}_2\text{aPyta}^{2-}$          | 7.9   |
| $\text{H}_2\text{aPyta}^{2-} + \text{H}^+ \leftrightarrow \text{H}_3\text{aPyta}^-$    | 3.04  |
| $\text{H}_3\text{aPyta}^- + \text{H}^+ \leftrightarrow \text{H}_4\text{aPyta}$         | 2.22  |
| $\text{aPyha}^{6-} + \text{H}^+ \leftrightarrow \text{HaPyha}^{5-}$                    | 10.16 |
| $\text{HaPyha}^{5-} + \text{H}^+ \leftrightarrow \text{H}_2\text{aPyha}^{4-}$          | 9.36  |
| $\text{H}_2\text{aPyha}^{4-} + \text{H}^+ \leftrightarrow \text{H}_3\text{aPyha}^{3-}$ | 5.87  |
| $\text{H}_3\text{aPyha}^{3-} + \text{H}^+ \leftrightarrow \text{H}_4\text{aPyha}^{2-}$ | 4.57  |
| $\text{H}_4\text{aPyha}^{2-} + \text{H}^+ \leftrightarrow \text{H}_5\text{aPyha}^-$    | 3.22  |
| $\text{H}_5\text{aPyha}^- + \text{H}^+ \leftrightarrow \text{H}_6\text{aPyha}$         | 1.88  |

**Table S6.** Hydrolysis constants of  $\text{Cu}^{2+}$ ,  $\text{Y}^{3+}$ ,  $\text{Ga}^{3+}$  and  $\text{Bi}^{3+}$  ions used to calculate the total binding constants of the **aPyta<sup>4-</sup>** and **aPyha<sup>6-</sup>** complexes with  $\text{Cu}^{2+}$ ,  $\text{Y}^{3+}$ ,  $\text{Ga}^{3+}$  and  $\text{Bi}^{3+}$  in the Hyperquad2003 program.

| Reaction equations                                                                                               | $\text{M}^{n+} =$ |                 |                  |                  |
|------------------------------------------------------------------------------------------------------------------|-------------------|-----------------|------------------|------------------|
|                                                                                                                  | $\text{Cu}^{2+}$  | $\text{Y}^{3+}$ | $\text{Ga}^{3+}$ | $\text{Bi}^{3+}$ |
| $\text{M}^{n+} + \text{H}_2\text{O} \leftrightarrow \text{MOH}^{(n-1)} + \text{H}^+$                             | -7.97[c]          | -7.7[a]         | -2.6[b]          | -1.09[a]         |
| $\text{M}^{n+} + 2\text{H}_2\text{O} \leftrightarrow \text{M}(\text{OH})_2^{(n-2)} + 2\text{H}^+$                | -16.23[c]         | -16.4[a]        | -5.9[b]          | -4.0[a]          |
| $\text{M}^{n+} + 3\text{H}_2\text{O} \leftrightarrow \text{M}(\text{OH})_3^{(n-3)} + 3\text{H}^+$                | -26.6[b]          | -26.0[a]        | -10.3[b]         | -8.86[a]         |
| $\text{M}^{n+} + 4\text{H}_2\text{O} \leftrightarrow \text{M}(\text{OH})_4^{(n-4)} + 4\text{H}^+$                | -39.7[b]          | -36.5[a]        | -16.6[b]         | -21.8[a]         |
| $2\text{M}^{n+} + \text{H}_2\text{O} \leftrightarrow \text{M}_2\text{OH}^{(2n-1)} + \text{H}^+$                  | -6.71[c]          | -               | -                | -                |
| $6\text{M}^{n+} + 12\text{H}_2\text{O} \leftrightarrow \text{M}_4(\text{OH})_4^{(6n-12)} + 12\text{H}^+$         | -                 | -               | -                | -1.0[b]          |
| $2\text{M}^{n+} + 2\text{H}_2\text{O} \leftrightarrow \text{M}_2(\text{OH})_2^{(2n-2)} + 2\text{H}^+$            | -10.55[c]         | -14.23[a]       | -                | -                |
| $3\text{M}^{n+} + 4\text{H}_2\text{O} \leftrightarrow \text{M}_3(\text{OH})_4^{(3n-4)} + 4\text{H}^+$            | -20.95[c]         | -               | -                | -                |
| $3\text{M}^{n+} + 5\text{H}_2\text{O} \leftrightarrow \text{M}_2(\text{OH})_6^{(3n-5)} + 5\text{H}^+$            | -                 | -31.6[a]        | -                | -                |
| $26\text{M}^{n+} + 65\text{H}_2\text{O} \leftrightarrow \text{M}_{26}(\text{OH})_{65}^{(26n-65)} + 65\text{H}^+$ | -                 | -               | -139.1[b]        | -                |

[a] Baes, C.F. and Mesmer, R.E. "The Hydrolysis of Cations", John Wiley & Sons, Inc., New York, 1976, P. 489.

[b] Paul L. Brown and Christian Ekberg, "Hydrolysis of Metal Ions", Wiley-VCH, 2016, V.2, P.917.

[c] Natalia V. Plyasunova, Mingsheng Wang, Yu Zhang, Mamoun Muhammed, Critical evaluation of thermodynamics of complex formation of metal ions in aqueous solutions II. Hydrolysis and hydroxo-complexes of  $\text{Cu}^{2+}$  at 298.15 K, Hydrometallurgy, 1997, 45, 37-51.

**Table S7.** Stepwise binding constants of protonated **aPyta<sup>4-</sup>** and **aPyha<sup>6-</sup>** with **Cu<sup>2+</sup>**, **Y<sup>3+</sup>**, **Ga<sup>3+</sup>** and **Bi<sup>3+</sup>** ions.

| Reaction equations                                                                          | logK             |                 |                  |                  |
|---------------------------------------------------------------------------------------------|------------------|-----------------|------------------|------------------|
|                                                                                             | Cu <sup>2+</sup> | Y <sup>3+</sup> | Ga <sup>3+</sup> | Bi <sup>3+</sup> |
| $\text{aPyta}^{4-} + \text{M}^{n+} \leftrightarrow \text{MaPyta}^{n-4}$                     | 14.96            | 8.9             | 19.5             | 28.78            |
| $\text{HaPyta}^{3-} + \text{M}^{n+} \leftrightarrow \text{MHaPyta}^{n-3}$                   | 11.31            | 6.89            | 14.21            | 26.25            |
| $\text{H}_2\text{aPyta}^{2-} + \text{M}^{n+} \leftrightarrow \text{MH}_2\text{aPyta}^{n-2}$ |                  | 3.54            |                  |                  |
| $\text{aPyha}^{6-} + \text{M}^{n+} \leftrightarrow \text{MaPyha}^{n-6}$                     | -                | 15.05           | 27.38            | -                |
| $\text{HaPyha}^{5-} + \text{M}^{n+} \leftrightarrow \text{MHaPyha}^{n-5}$                   | 18.21            | 13.23           | -                |                  |
| $\text{H}_2\text{aPyha}^{4-} + \text{M}^{n+} \leftrightarrow \text{MH}_2\text{aPyha}^{n-4}$ | 11.38            | 8.7             | -                | -                |
| $\text{H}_3\text{aPyha}^{3-} + \text{M}^{n+} \leftrightarrow \text{H}_3\text{MaPyha}^{n-3}$ |                  | 5.77            | 19.81            | -                |

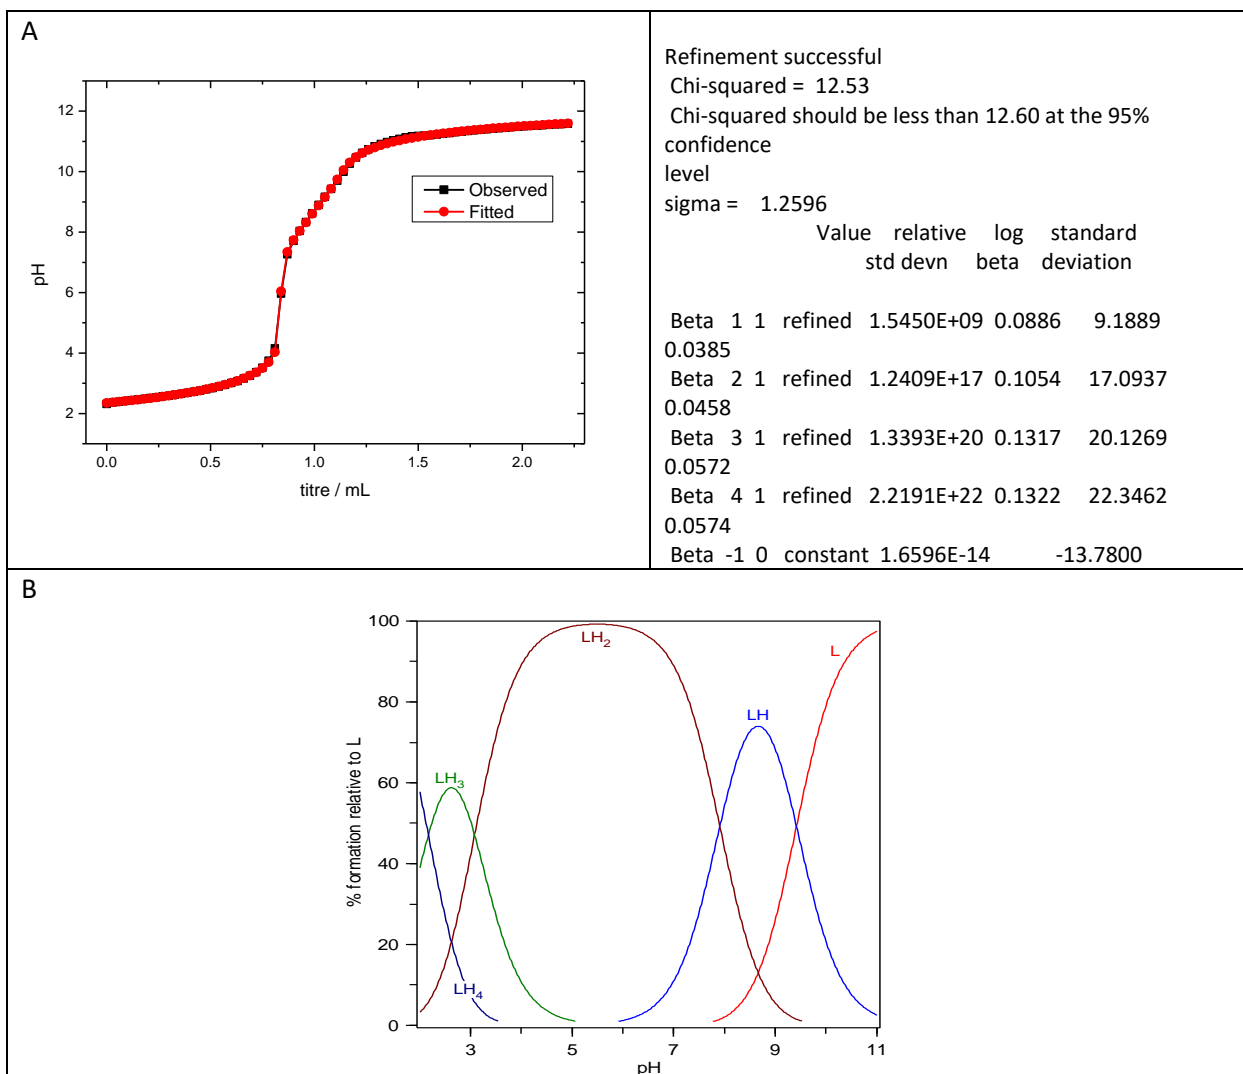

**Figure S39.** Potentiometric titration curves observed (black points) and fitted (red points) and statistical parameters obtained by the HYPERQUAD2003 program (A), and ligand **aPyta**<sup>4-</sup> (1 mM) species distribution as a function of pH (B).

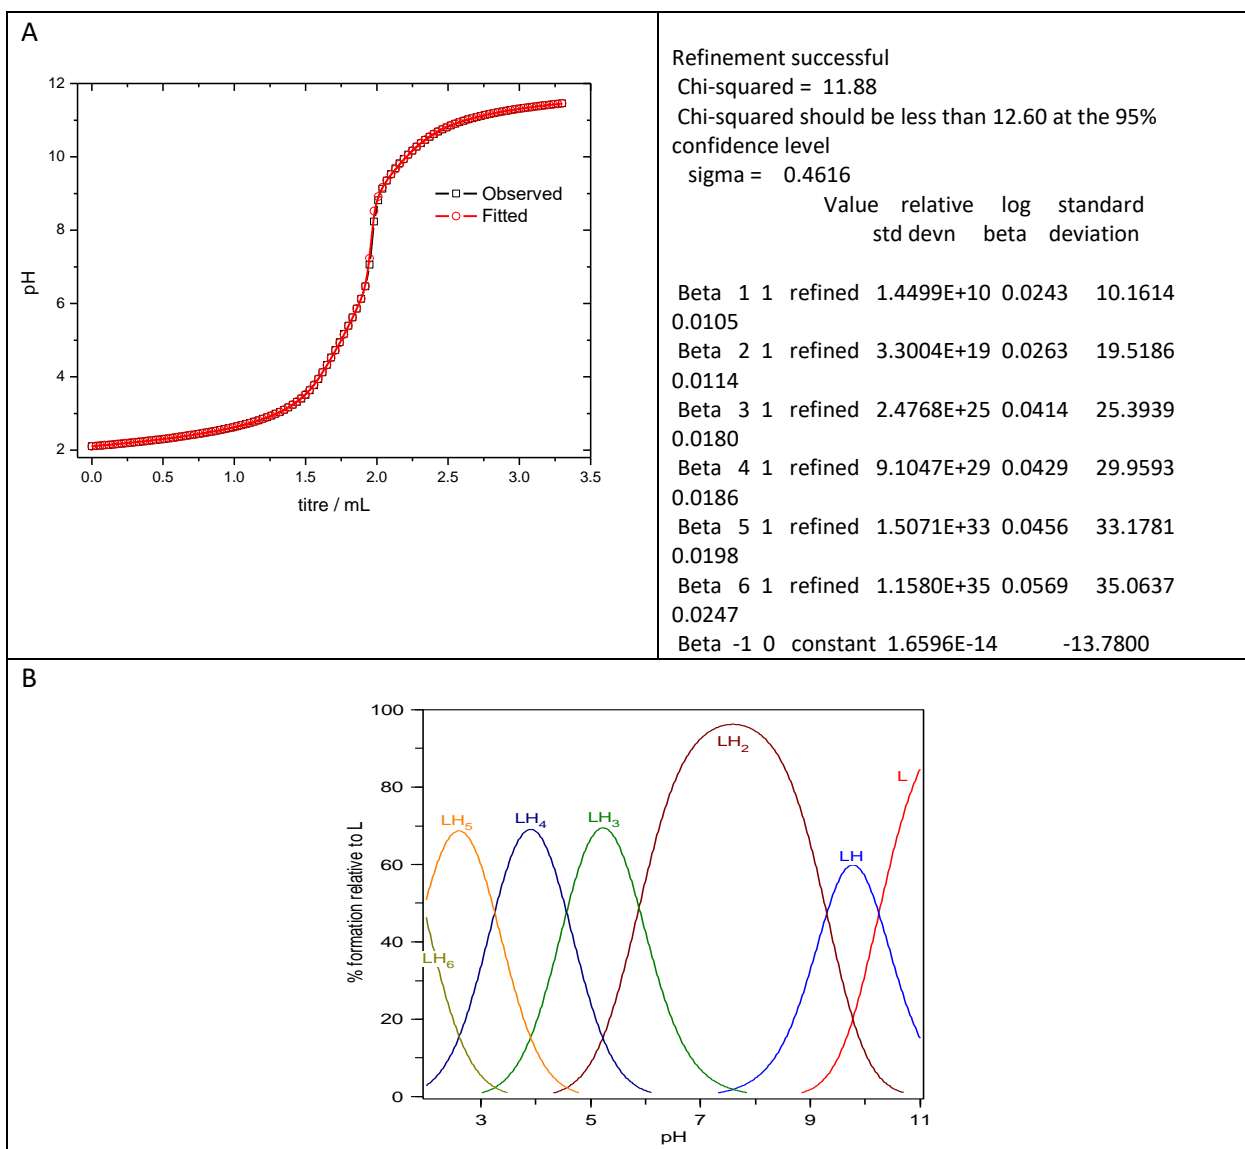

**Figure S40.** Potentiometric titration curves observed (black points) and fitted (red points) and statistical parameters obtained by the HYPERQUAD2003 program (A), and ligand **aPyha**<sup>6-</sup> (1 mM) species distribution as a function of pH (B).

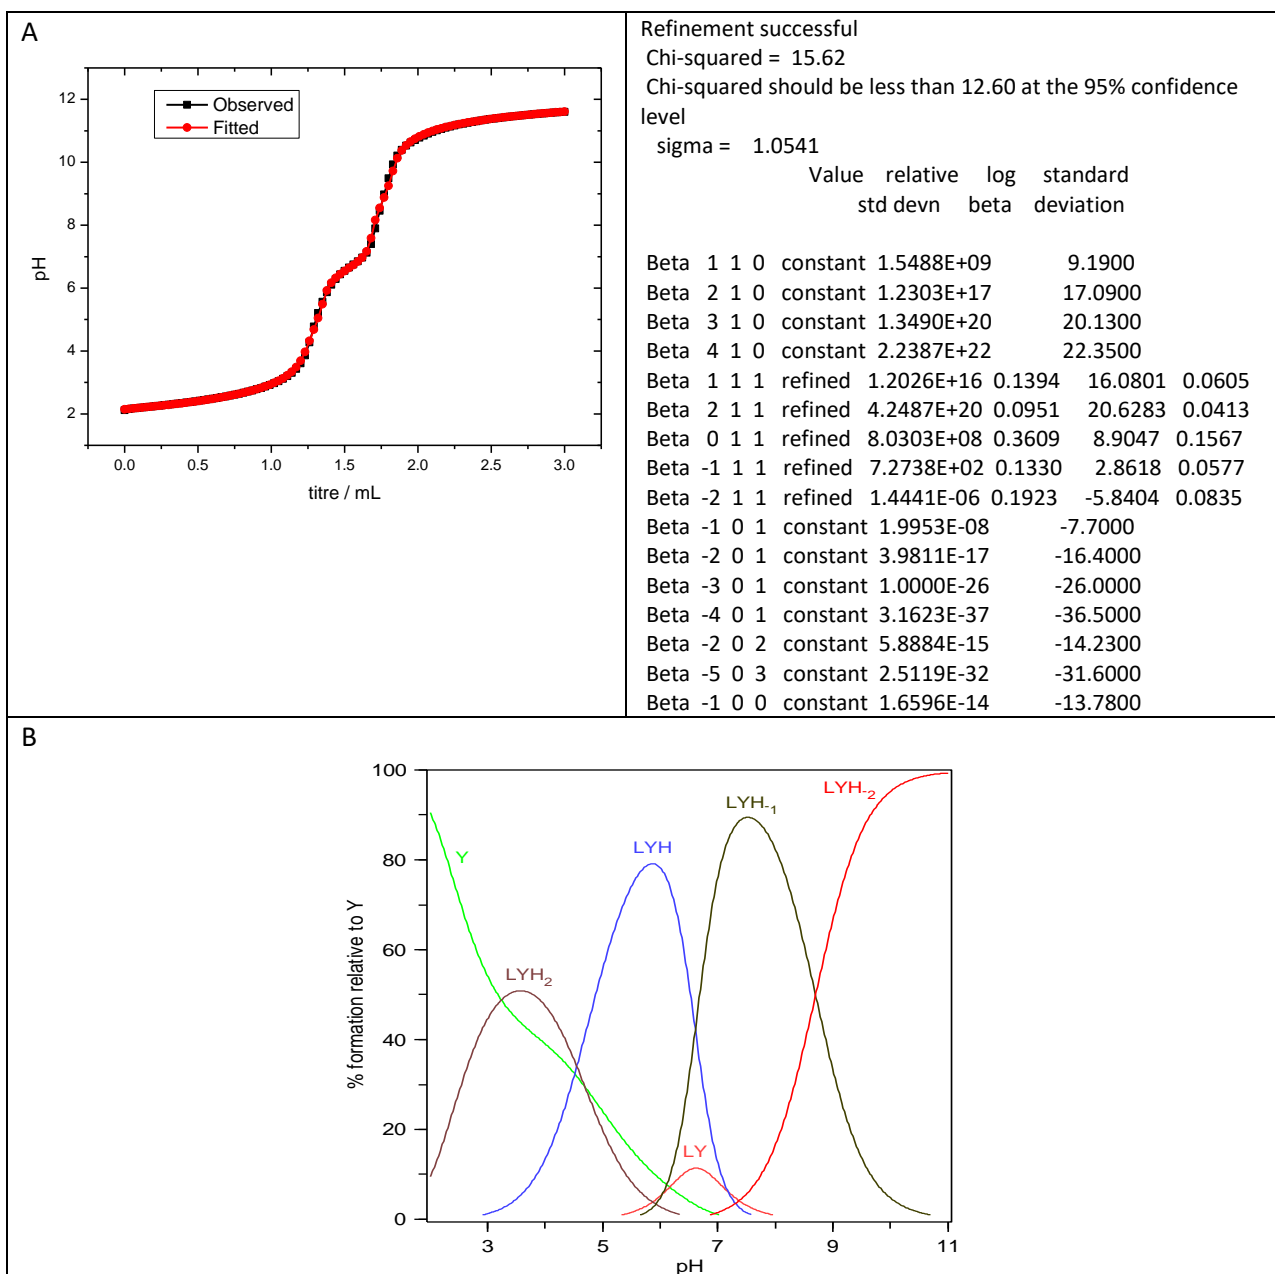

**Figure S41.** Potentiometric titration curves observed (black points) and fitted (red points) and statistical parameters obtained by the HYPERQUAD2003 program (A), and species distribution diagram in the system  $Y^{3+}$  (1 mM),  $aPyta^{4-}$  (1 mM),  $KNO_3$ (0.1 M) as a function of pH (B).



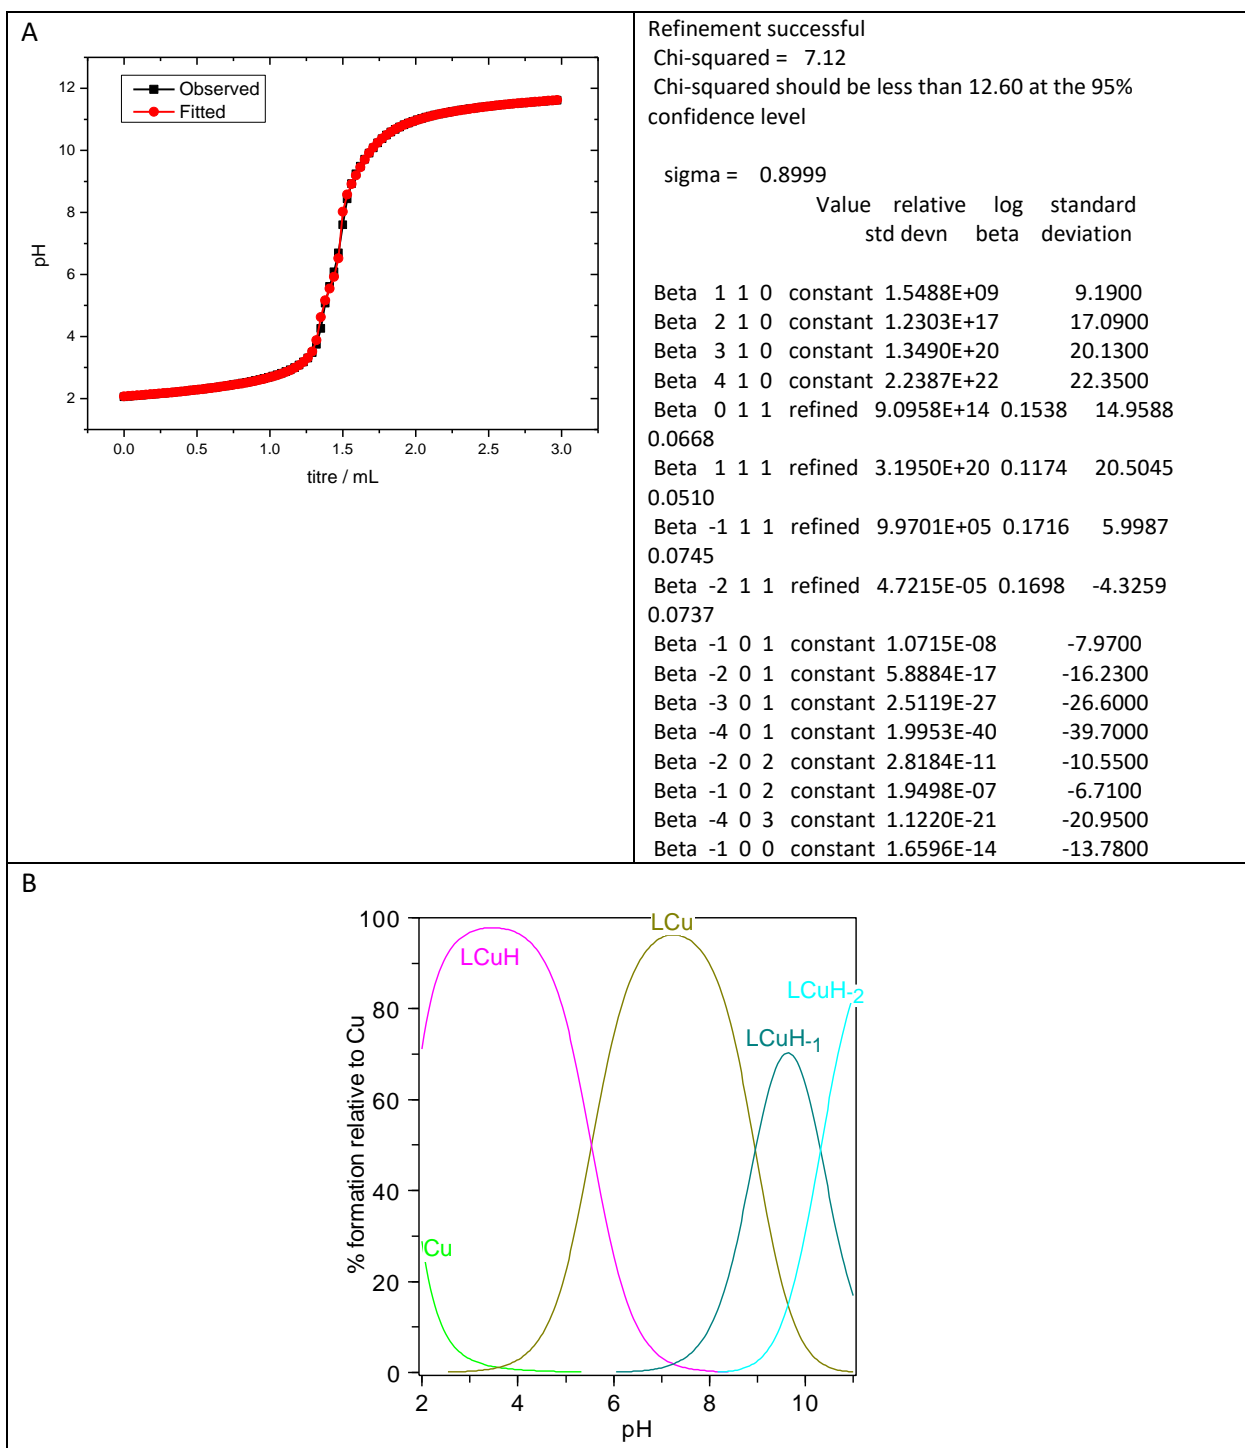

**Figure S42.** Potentiometric titration curves observed (black points) and fitted (red points) and statistical parameters obtained by the HYPERQUAD2003 program (A), and species distribution diagram in the system  $\text{Cu}^{2+}$  (1 mM),  $\text{aPyta}^{4-}$  (1 mM),  $\text{KNO}_3$  (0.1 M) as a function of pH (B).

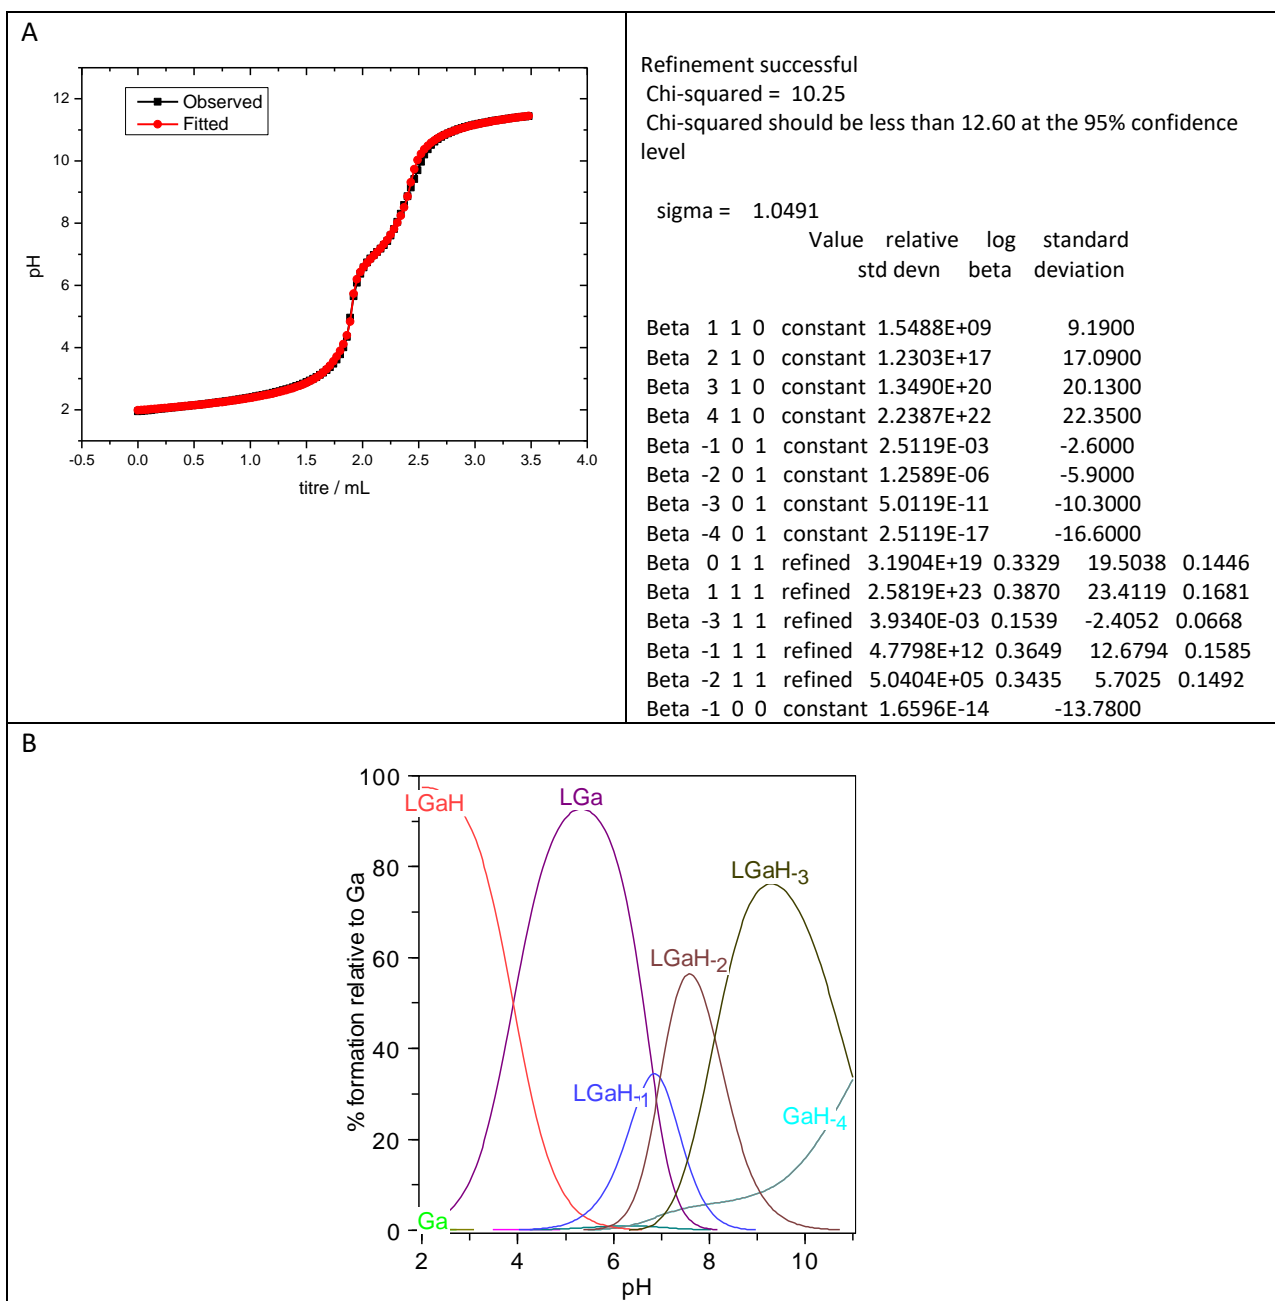

**Figure S43.** Potentiometric titration curves observed (black points) and fitted (red points) and statistical parameters obtained by the HYPERQUAD2003 program (A), and species distribution diagram in the system  $\text{Ga}^{3+}$  (1 mM),  $\text{aPyta}^{4-}$  (1 mM),  $\text{KNO}_3$  (0.1 M) as a function of pH (B).

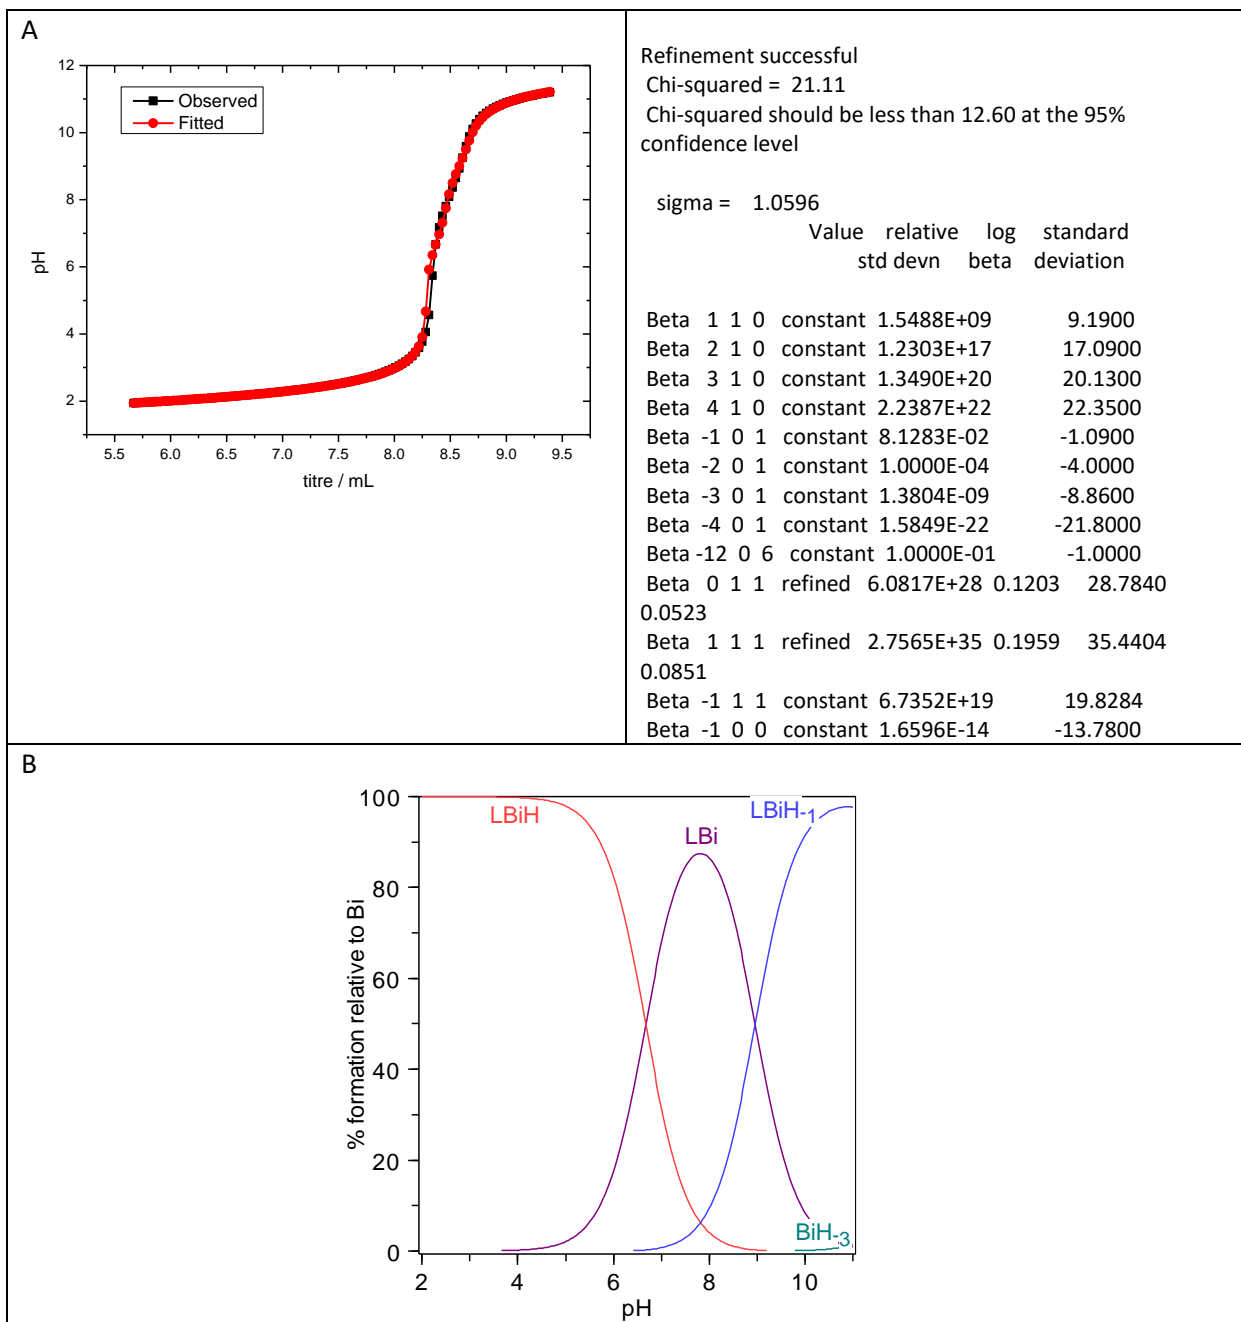

**Figure S44.** Potentiometric titration curves observed (black points) and fitted (red points) and statistical parameters obtained by the HYPERQUAD2003 program (A), and species distribution diagram in the system  $\text{Bi}^{3+}$  (1 mM),  $\text{aPyta}^{4-}$  (1 mM),  $\text{KNO}_3$  (0.1 M) as a function of pH (B).

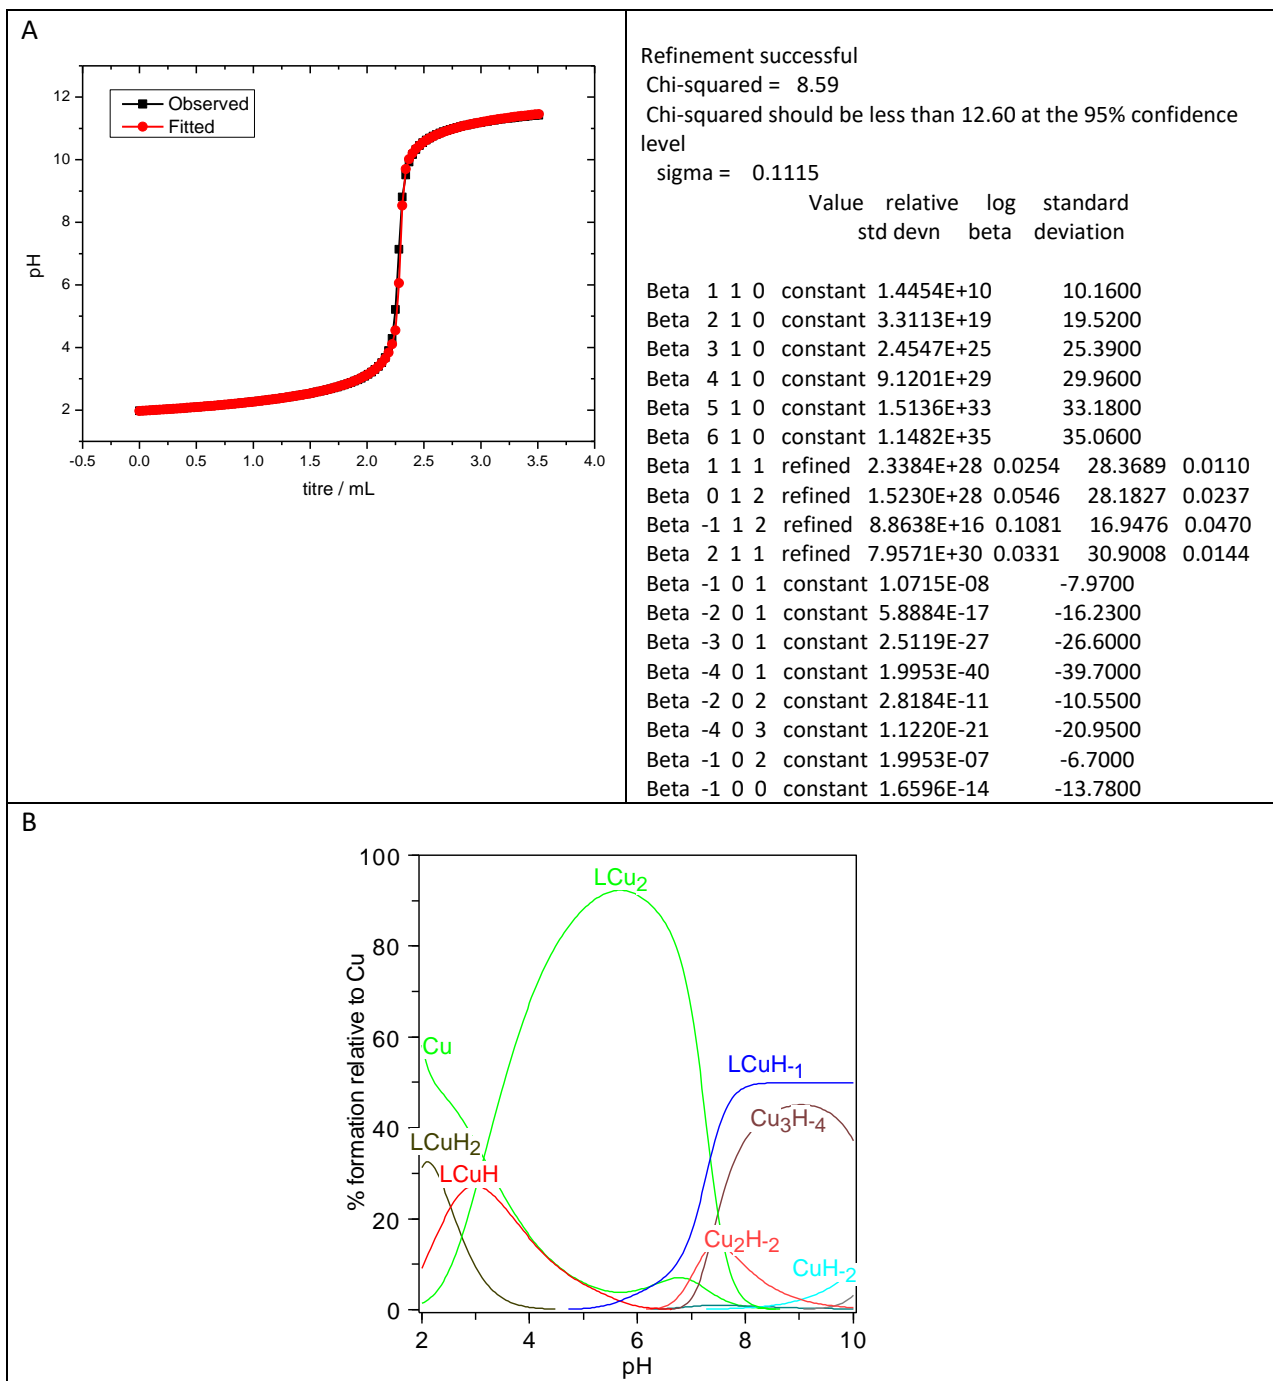

**Figure S45.** Potentiometric titration curves observed (black points) and fitted (red points) and statistical parameters obtained by the HYPERQUAD2003 program (A), and species distribution diagram in the system  $\text{Cu}^{2+}$  (2 mM),  $\text{aPyha}^{6-}$  (1 mM),  $\text{KNO}_3$  (0.1 M) as a function of pH (B).

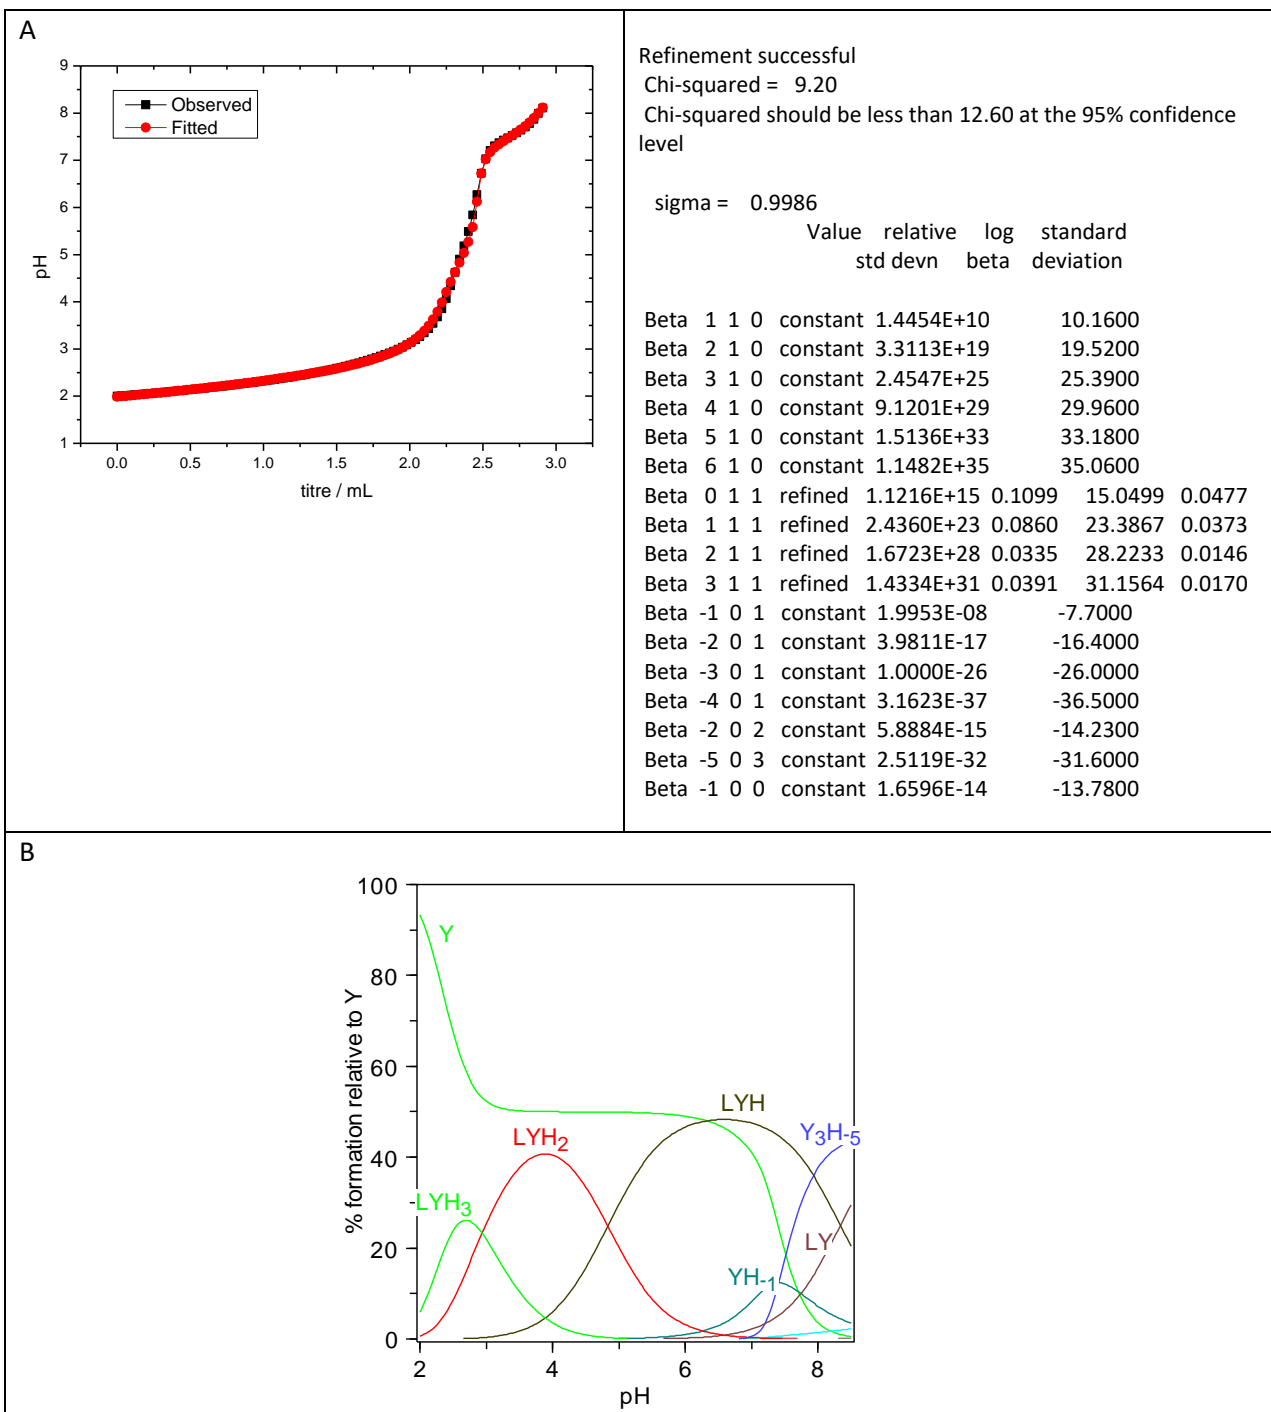

**Figure S46.** Potentiometric titration curves observed (black points) and fitted (red points) and statistical parameters obtained by the HYPERQUAD2003 program (A), and species distribution diagram in the system  $Y^{3+}$  (3.2 mM),  $aPyha^{6-}$  (1.6 mM),  $KNO_3$  (0.1 M) as a function of pH (B).

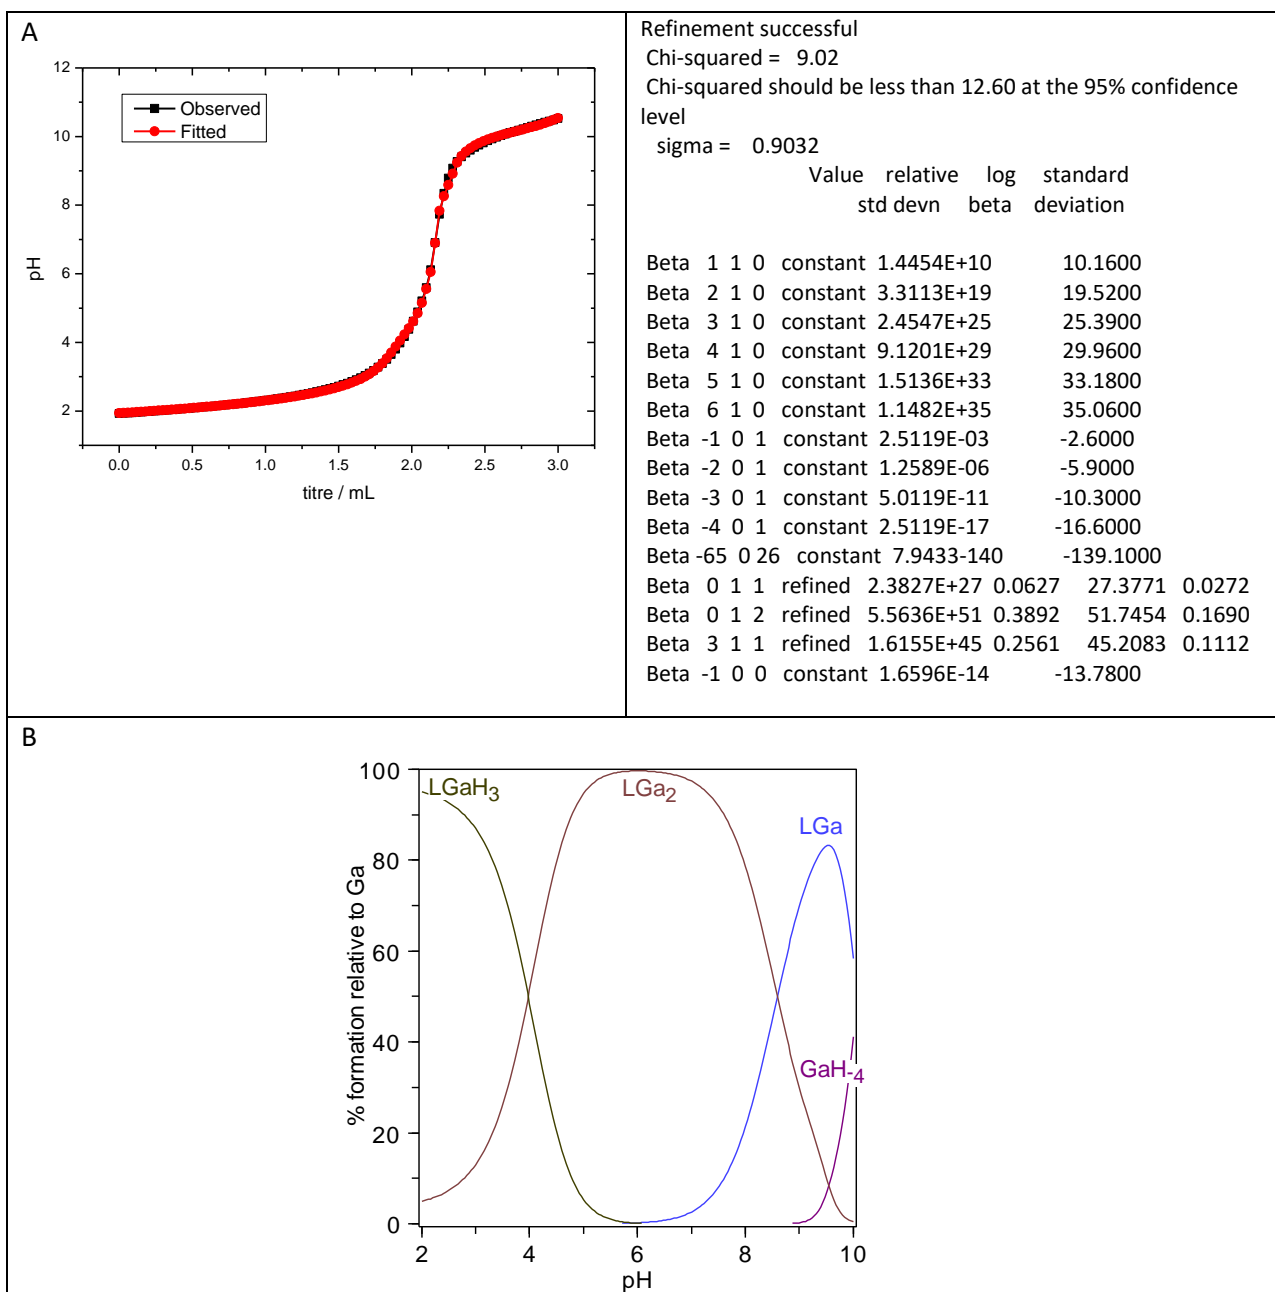

**Figure S47.** Potentiometric titration curves observed (black points) and fitted (red points) and statistical parameters obtained by the HYPERQUAD2003 program (A), and species distribution diagram in the system  $\text{Ga}^{3+}$  (1 mM),  $\text{aPyha}^{6-}$  (1 mM),  $\text{KNO}_3$  (0.1 M) as a function of pH (B).

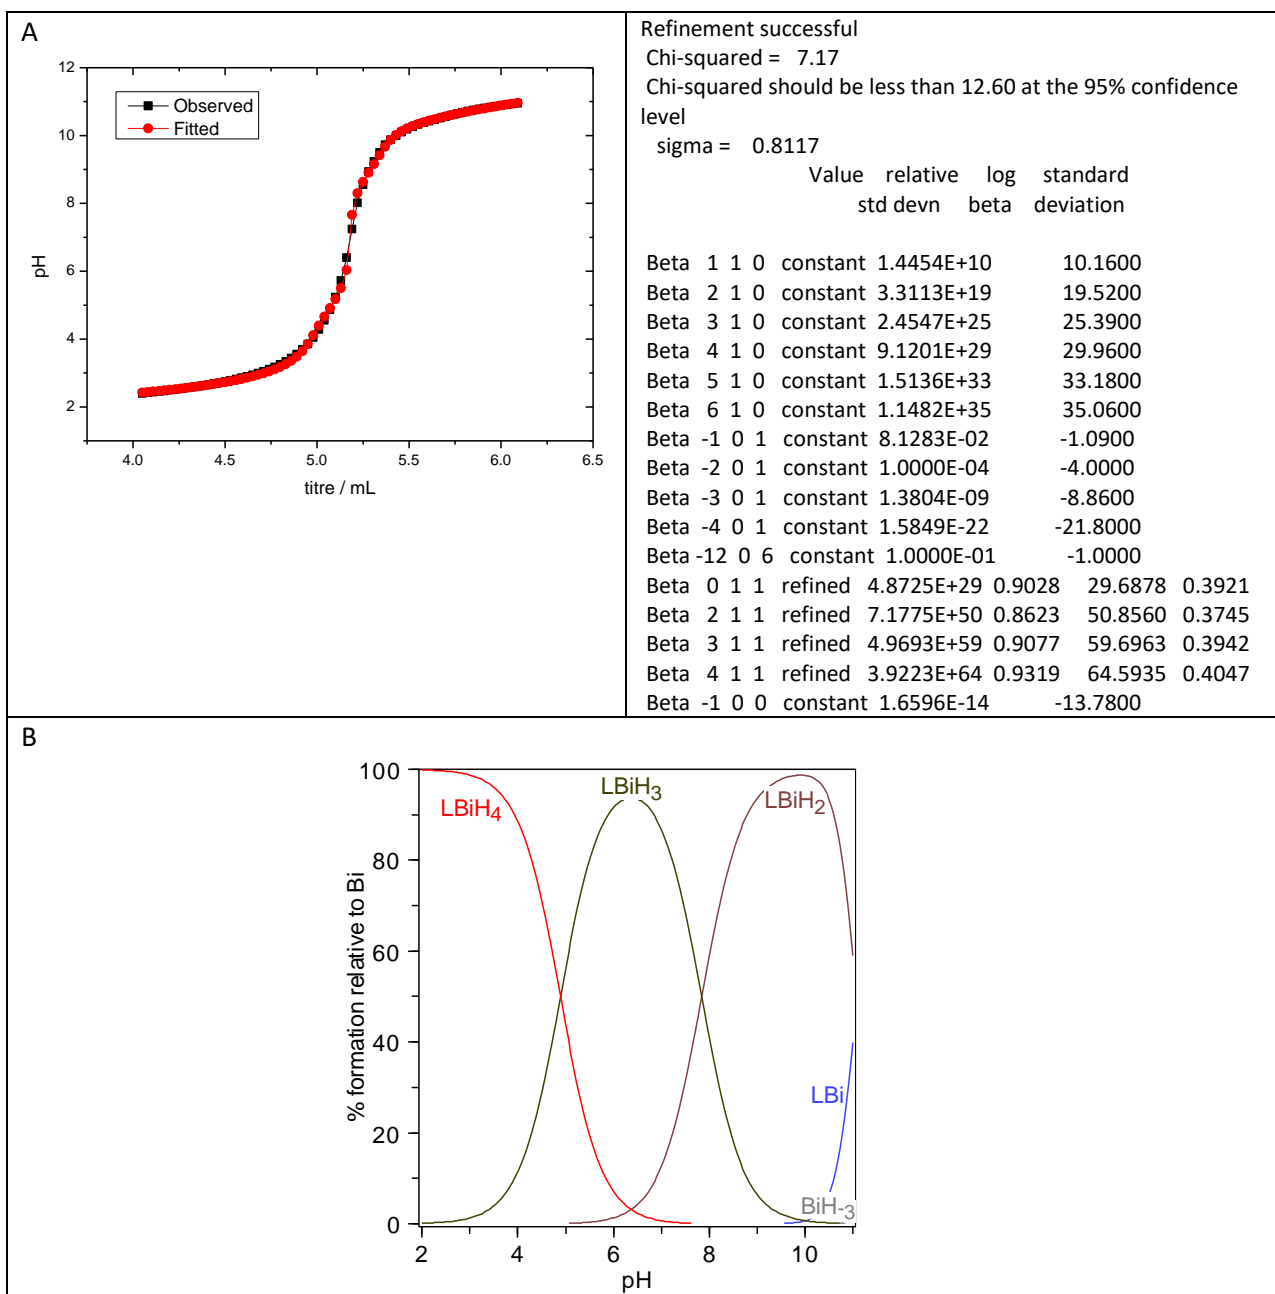

**Figure S48.** Potentiometric titration curves observed (black points) and fitted (red points) and statistical parameters obtained by the HYPERQUAD2003 program (A), and species distribution diagram in the system  $\text{Bi}^{3+}$  (0.9 mM),  $\text{aPyha}^{6-}$  (1 mM),  $\text{KNO}_3$  (0.1 M) as a function of pH (B).

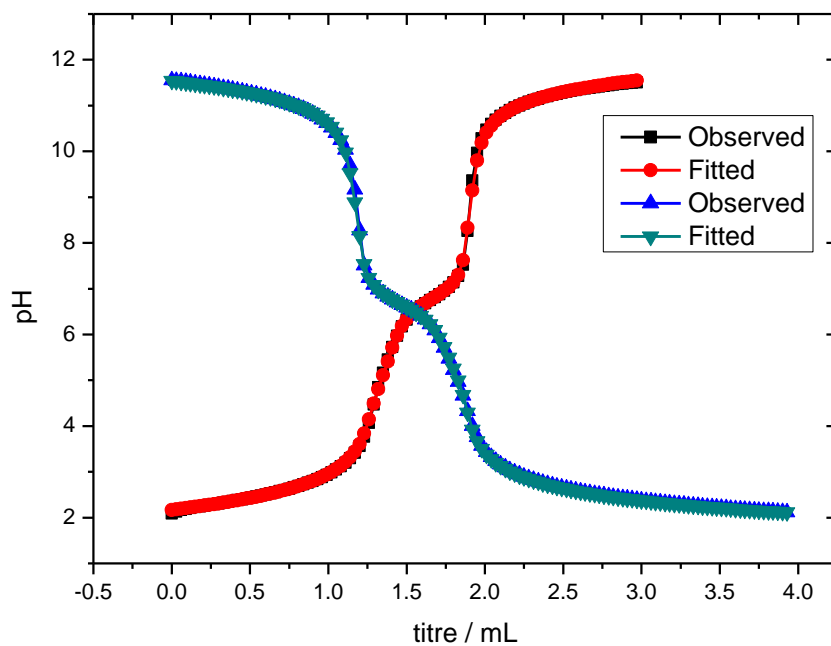

**Figure S49.** Potentiometric titration curves for direct titration observed (black points) and fitted (red points) and for back titration observed (blue points) and fitted (teal points) in the system  $Y^{3+}$  (1 mM),  $aPyta^{4-}$  (1.3 mM),  $KNO_3$  (0.1 M).

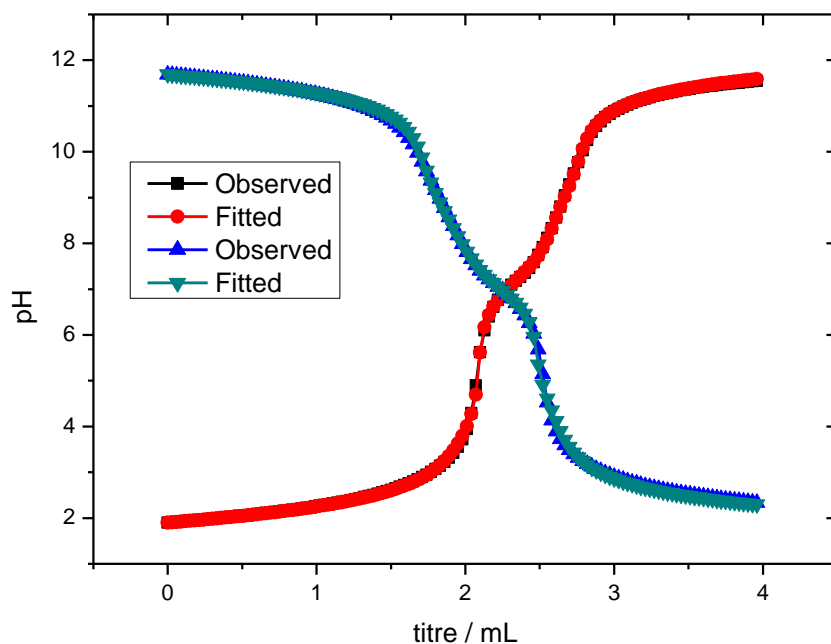

**Figure S50.** Potentiometric titration curves for direct titration observed (black points) and fitted (red points) and for back titration observed (blue points) and fitted (teal points) in the system  $Ga^{3+}$  (1 mM),  $aPyta^{4-}$  (1.3 mM),  $KNO_3$  (0.1 M).
